# Supplementary material for: A family of microporous carbons prepared via a simple metal salt carbonization route with high selectivity for exceptional gravimetric and volumetric post-combustion CO2capture
Source: Royal Society of Chemistry journal article supplement (doi:10.1039/c4ta03565h), 2014-07-22
Supplement: c4ta03565h1.pdf [file c4ta03565h1.pdf]

## *Supporting Information*

### **A family of microporous carbons prepared via a simple metal salt carbonization route with high selectivity for exceptional gravimetric and volumetric post-combustion CO<sub>2</sub> uptake**

Eric Masika, Beatrice Adeniran and Robert Mokaya\*

University of Nottingham, University Park, Nottingham NG7 2RD, U. K.

*E-mail: r.mokaya@nottingham.ac.uk (R. Mokaya)*

**Supporting Table S1.** Textural properties and CO<sub>2</sub> uptake of metal salt (potassium hydrogen phthalate, KHP) derived carbon materials via carbonisation at 900 °C for 1 to 4 h.

| Sample    | Surface area <sup>a</sup><br>(m <sup>2</sup> /g) | Pore volume <sup>b</sup><br>(cm <sup>3</sup> /g) | Pore size <sup>c</sup><br>(Å) | CO <sub>2</sub> uptake <sup>d</sup> (mmol/g) |       |        |
|-----------|--------------------------------------------------|--------------------------------------------------|-------------------------------|----------------------------------------------|-------|--------|
|           |                                                  |                                                  |                               | 0.15 bar                                     | 1 bar | 20 bar |
| CKHP900-1 | 1601 (1417)                                      | 0.77 (0.63)                                      | 5/6/8/12/20                   | 1.0                                          | 3.7   | 13.0   |
| CKHP900-2 | 2104 (1805))                                     | 1.11 (0.81)                                      | 8.5/12/16/22                  | 0.8                                          | 3.0   | 12.7   |
| CKHP900-3 | 1600 (1360)                                      | 0.81 (0.61)                                      | 6.5/8.5/12/21                 | 1.1                                          | 3.8   | 13.7   |
| CKHP900-4 | 1561 (1452)                                      | 0.81 (0.69)                                      | 6.8/8.5/12                    | 0.9                                          | 3.5   | 12.6   |

The values in the parenthesis refer to: <sup>a</sup>micropore surface area and <sup>b</sup>micropore volume. <sup>c</sup>pore size distribution maxima obtained from NLDFIT analysis. <sup>d</sup>CO<sub>2</sub> uptake at 25 °C and various pressures (i.e., 0.15 bar, 1 bar and 20 bar).

**Supporting Table S2.** Textural properties and CO<sub>2</sub> uptake of metal salt (potassium hydrogen phthalate, KHP) derived carbon materials via carbonisation at 700 °C for 1 to 4 h.

| Sample    | Surface area <sup>a</sup><br>(m <sup>2</sup> /g) | Pore volume <sup>b</sup><br>(cm <sup>3</sup> /g) | Pore size <sup>c</sup><br>(Å) | CO <sub>2</sub> uptake <sup>d</sup> (mmol/g) |       |        |
|-----------|--------------------------------------------------|--------------------------------------------------|-------------------------------|----------------------------------------------|-------|--------|
|           |                                                  |                                                  |                               | 0.15 bar                                     | 1 bar | 20 bar |
| CKHP700-1 | 932 (900)                                        | 0.44 (0.39)                                      | 7/8.5                         | 1.6                                          | 4.2   | 7.9    |
| CKHP700-2 | 795 (760))                                       | 0.44 (0.34))                                     | 6                             | 1.7                                          | 4.1   | 6.9    |
| CKHP700-3 | 1019 (991)                                       | 0.47 (0.43)                                      | 7/8.5                         | 1.5                                          | 4.2   | 8.8    |
| CKHP700-4 | 1014 (983)                                       | 0.47 (0.43)                                      | 6/8.5                         | 1.5                                          | 4.4   | 8.9    |

The values in the parenthesis refer to: <sup>a</sup>micropore surface area and <sup>b</sup>micropore volume. <sup>c</sup>pore size distribution maxima obtained from NLDFT analysis. <sup>d</sup>CO<sub>2</sub> uptake at 25 °C and various pressures (i.e., 0.15 bar, 1 bar and 20 bar).

**Supporting Table S3.** CO<sub>2</sub> uptake of various porous carbons at 25 °C and 0.15 bar or 1 bar.

|                                            | CO <sub>2</sub> uptake (mmol/g) |          | Reference |
|--------------------------------------------|---------------------------------|----------|-----------|
|                                            | 1 bar                           | 0.15 bar |           |
| Sawdust-derived activated carbon           | 4.8                             | 1.2      | 1         |
| KOH-activated templated carbons            | 3.4                             | ~1.0     | 2         |
| Hierarchical porous carbon (HPC)           | 3.0                             | ~0.9     | 3         |
| Petroleum pitch-derived activated carbon   | 4.55                            | ~1.0     | 4         |
| Activated carbon spheres                   | 4.55                            | ~1.1     | 5         |
| Phenolic resin activated carbon spheres    | 4.5                             | ~1.2     | 6         |
| Poly(benzoxazine-co-resol)-derived carbon  | 3.3                             | 1.0      | 7         |
| Fungi-derived activated carbon             | 3.5                             | ~1.0     | 8         |
| Chitosan-derived activated carbon          | 3.86                            | ~1.1     | 9         |
| Polypyrrole derived activated carbon       | 3.9                             | ~1.0     | 10        |
| Soya bean derived N-doped activated carbon | 4.24                            | 1.2      | 11        |
| N-doped ZTCs                               | 4.4                             | ~1.0     | 12        |
| Activated templated N-doped carbon         | 4.5                             | 1.4      | 13        |
| Polyaniline derived activated carbon       | 4.3                             | 1.38     | 14        |
| N-doped activated carbon monoliths         | 5.14                            | 1.25     | 15        |
| Activated N-doped carbon                   | 3.2                             | 1.5      | 16        |
| Activated hierarchical N-doped carbon      | 4.8                             | 1.4      | 17        |
| Activated N-doped carbon from algae        | 4.5                             | ~1.1     | 18        |

1. M. Sevilla and A. B. Fuertes, *Energy Environ. Sci.*, 2011, **4**, 1765.
2. M. Sevilla and A. B. Fuertes, *J. Colloid Interface Sci.*, 2012, **366**, 147.
3. G. Srinivas, V. Krungleviciute, Z. X. Guo and T. Yildirim, *Energy Environ. Sci.*, 2014, **7**, 335.
4. J. Silvestre-Albero, A. Wahby, A. Sepulveda-Escribano, M. Martinez-Escandell, K. Kaneko and F. Rodriguez-Reinoso, *Chem. Commun.*, 2011, **47**, 6840.
5. N. P. Wickramaratne and M. Jaroniec, *ACS Appl. Mater. Interfaces*, 2013, **5**, 1849.
6. N. P. Wickramaratne and M. Jaroniec, *J. Mater. Chem. A*, 2013, **1**, 112.
7. G. P. Hao, W. C. Li, D. Qian, G. H. Wang, W. P. Zhang, T. Zhang, A. Q. Wang, F. Schuth, H. J. Bongard and A. H. Lu, *J. Am. Chem. Soc.*, 2011, **133**, 11378.
8. J. Wang, A. Heerwig, M. R. Lohe, M. Oschatz, L. Borchardt and Stefan Kaskel, *J. Mater. Chem.*, 2012, **22**, 13911.
9. X. Fan, L. Zhang, G. Zhang, Z. Shu, J. Shi, *Carbon*, 2013, **61**, 423.
10. M. Sevilla, P. Valle-Vigon and A. B. Fuertes, *Adv. Funct. Mater.*, 2011, **21**, 2781.
11. W. Xing, C. Liu, Z. Y. Zhou, L. Zhang, J. Zhou, S. P. Zhuo, Z. F. Yan, H. Gao, G. Q. Wang and S. Z. Qiao, *Energy Environ. Sci.*, 2012, **5**, 7323.
12. Y. D. Xia, R. Mokaya, G. S. Walker and Y. Q. Zhu, *Adv. Energy Mater.*, 2011, **1**, 678.
13. Y. Zhao, L. Zhao, K. X. Yao, Y. Yang, Q. Zhang and Y. Han, *J. Mater. Chem.*, 2012, **22**, 19726.
14. Z. Zhang, J. Zhou, W. Xing, Q. Xue, Z. Yan, S. Zhuo and S. Z. Qiao, *Phys. Chem. Chem. Phys.*, 2013, **15**, 2523.
15. M. Nandi, K. Okada, A. Dutta, A. Bhaumik, J. Maruyama, D. Derks and Hiroshi Uyama, *Chem. Commun.*, 2012, **48**, 10283.
16. M. Saleh, J. N. Tiwari, K. C. Kemp, M. Yousuf and K. S. Kim, *Environ. Sci. Technol.*, 2013, **47**, 5467.
17. D. Lee, C. Zhang, C. Wei, B. L. Ashfeld and H. Gao, *J. Mater. Chem. A*, 2013, **1**, 14862.
18. M. Sevilla, C. Falco, M. M. Titirici and A. B. Fuertes, *RSC Advances*, 2012, **2**, 12792.

**Supporting Table S4.** CO<sub>2</sub> uptake at 0 °C of metal salt (potassium hydrogen phthalate, KHP) derived carbon materials via carbonisation at 800 °C for 1 to 4 h.

| Sample    | CO <sub>2</sub> uptake at 0 °C (mmol/g) |       |        |        |
|-----------|-----------------------------------------|-------|--------|--------|
|           | 1 bar                                   | 5 bar | 10 bar | 20 bar |
| CKHP800-1 | 6.4                                     | 10.4  | 11.6   | 12.1   |
| CKHP800-2 | 6.5                                     | 11.0  | 12.5   | 13.3   |
| CKHP800-3 | 5.5                                     | 10.7  | 12.9   | 13.9   |
| CKHP800-4 | 6.5                                     | 10.6  | 11.7   | 12.3   |

**Supporting Table S5.** CO<sub>2</sub> uptake at 0 °C of metal salt (potassium hydrogen phthalate, KHP) derived carbon materials via carbonisation at 900 °C for 1 to 4 h.

| Sample    | CO <sub>2</sub> uptake at 0 °C (mmol/g) |       |        |        |
|-----------|-----------------------------------------|-------|--------|--------|
|           | 1 bar                                   | 5 bar | 10 bar | 20 bar |
| CKHP900-1 | 5.3                                     | 10.8  | 13.3   | 15.3   |
| CKHP900-2 | 4.8                                     | 10.3  | 13.2   | 15.7   |
| CKHP900-3 | 5.1                                     | 11.2  | 13.2   | 15.5   |
| CKHP900-4 | 5.3                                     | 10.5  | 13.0   | 14.8   |

**Supporting Table S6.** CO<sub>2</sub> uptake at 0 °C of metal salt (potassium hydrogen phthalate, KHP) derived carbon materials via carbonisation at 700 °C for 1 to 4 h.

| Sample    | CO <sub>2</sub> uptake at 0 °C (mmol/g) |       |        |        |
|-----------|-----------------------------------------|-------|--------|--------|
|           | 1 bar                                   | 5 bar | 10 bar | 20 bar |
| CKHP700-1 | 5.7                                     | 7.9   | 8.5    | 8.8    |
| CKHP700-2 | 5.1                                     | 6.6   | 7.1    | 7.4    |
| CKHP700-3 | 6.2                                     | 8.8   | 9.5    | 9.8    |
| CKHP700-4 | 6.3                                     | 8.8   | 9.5    | 9.9    |

**Supporting Table S7.** Textural properties of unwashed CKHP carbon products

| Sample        | Surface area <sup>a</sup><br>(m <sup>2</sup> /g) | Pore volume <sup>b</sup><br>(cm <sup>3</sup> /g) | Pore size <sup>c</sup><br>(Å) |
|---------------|--------------------------------------------------|--------------------------------------------------|-------------------------------|
| CKHP700-2-UW  | 2 (1)                                            |                                                  |                               |
| CKHP800-2-UW  | 69 (68))                                         | 0.20 (0.03)                                      |                               |
| CKHP900-2-UW  | 597 (467)                                        | 0.39 (0.22)                                      | 6.4/8.5/11.5                  |
| CKHP1000-2-UW | 461 (395)                                        | 0.26(0.19)                                       | 6.5/8.5/11.5                  |

The values in the parenthesis refer to: <sup>a</sup>micropore surface area and <sup>b</sup>micropore volume. <sup>c</sup>pore size distribution maxima obtained from NLDFT analysis.



**Supporting Table S8.** Textural properties and CO<sub>2</sub> uptake of various CKHP carbons before and after compaction at a load of 5 tons (i.e. 370 MPa)

| Sample          | Surface area <sup>a</sup><br>(m <sup>2</sup> /g) | Pore volume <sup>b</sup><br>(cm <sup>3</sup> /g) | Pore size <sup>c</sup><br>(Å) | CO <sub>2</sub> uptake <sup>d</sup> (mmol/g) |       |        |
|-----------------|--------------------------------------------------|--------------------------------------------------|-------------------------------|----------------------------------------------|-------|--------|
|                 |                                                  |                                                  |                               | 0.15 bar                                     | 1 bar | 20 bar |
| CKHP600-2       | 513 (494)                                        | 0.27 (0.24)                                      | 6.8                           | 1.2                                          | 2.8   | 4.6    |
| CKHP600-2-C5    | 516 (496)                                        | 0.28 (0.24)                                      | 5.8                           | 1.4                                          | 3.3   | 4.9    |
| CKHP700-1       | 932 (900)                                        | 0.44 (0.39)                                      | 7/8.5                         | 1.6                                          | 4.2   | 7.9    |
| CKHP700-1-C5    | 803 (775)                                        | 0.43 (0.37)                                      | 6/8                           | 1.5                                          | 4.1   | 7.7    |
| CKHP800-1       | 1255 (1200)                                      | 0.59 (0.52)                                      | 7/8.5/12                      | 1.3                                          | 4.4   | 11.1   |
| CKHP800-1-C5    | 1072 (1028)                                      | 0.56 (0.49)                                      | 6.5/8.5/12                    | 1.3                                          | 4.2   | 10.8   |
| CKHP900-1       | 1601 (1417)                                      | 0.77 (0.63)                                      | 5/6/8/12/20                   | 1.0                                          | 3.7   | 13.0   |
| CKHP900-1-C5    | 1508 (1403)                                      | 0.77 (0.66)                                      | 6/8/12                        | 1.0                                          | 3.5   | 12.7   |
| CKHP900-2-UW    | 597 (467)                                        | 0.39 (0.22)                                      | 6.4/8.5/11.5                  | 1.2                                          | 2.9   | 8.6    |
| CKHP900-2-UW-C5 | 789 (664)                                        | 0.48 (0.31)                                      | 6.4/8.5/11.5                  | 1.4                                          | 3.0   | 7.4    |

The values in the parenthesis refer to: <sup>a</sup>micropore surface area and <sup>b</sup>micropore volume. <sup>c</sup>pore size distribution maxima obtained from NLDFIT analysis. <sup>d</sup>CO<sub>2</sub> uptake at 25 °C and various pressures (i.e., 0.15 bar, 1 bar and 20 bar).

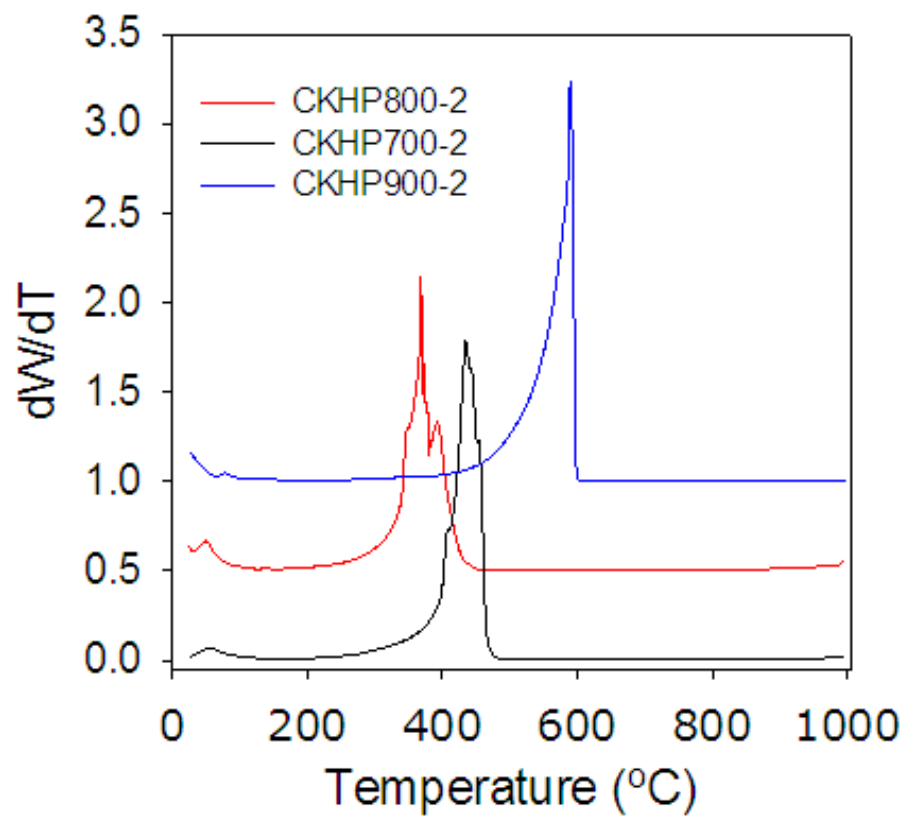

**Supporting Figure S1.** Differential thermogravimetric (DTG) profiles of CKHP carbons derived from potassium hydrogen phthalate (KHP) via carbonisation at various temperatures for 2 h.

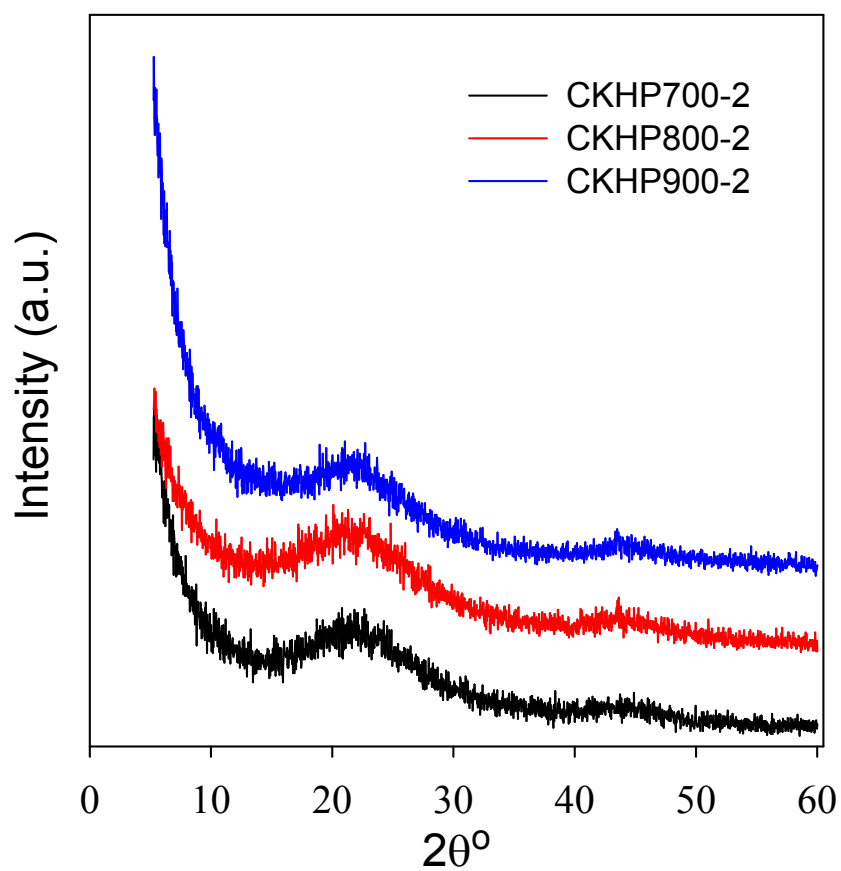

**Supporting Figure S2.** Powder XRD patterns of CKHP carbons derived from potassium hydrogen phthalate (KHP) via carbonisation at various temperatures for 2 h.

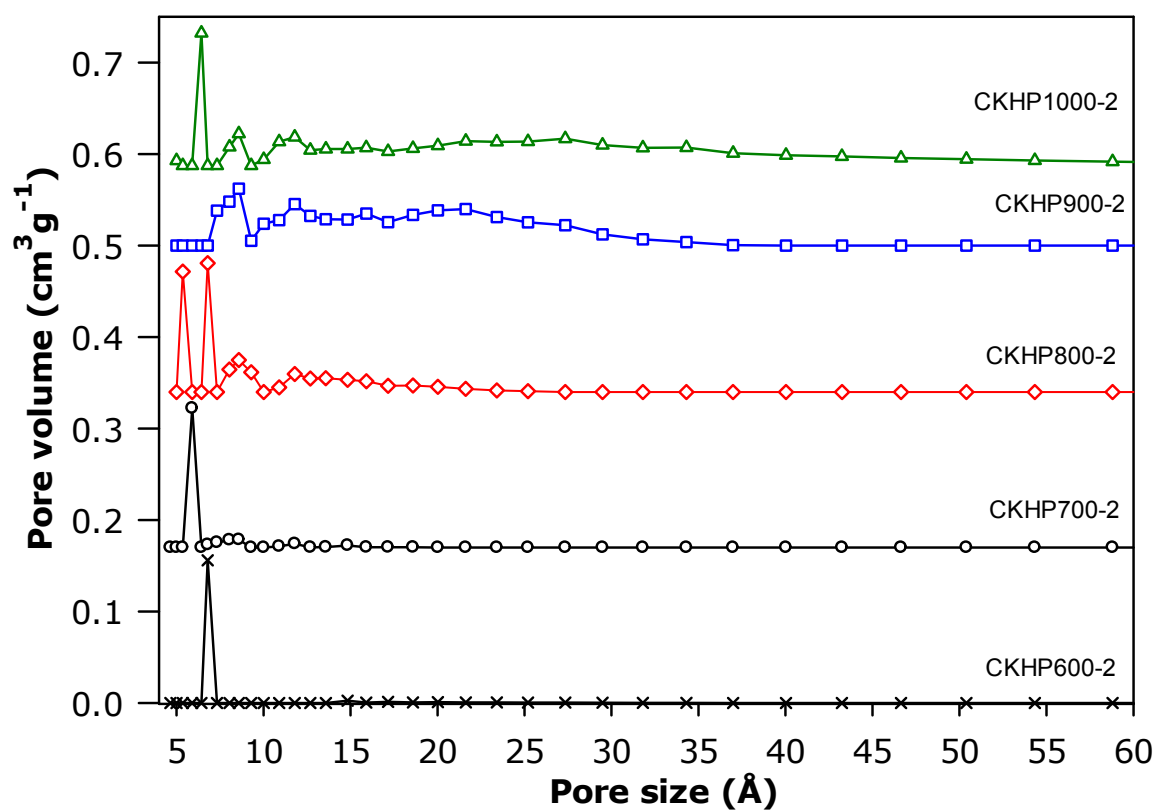

**Supporting Figure S3.** Pore size distribution curves of CKHP carbons derived from potassium hydrogen phthalate (KHP) via carbonisation at various temperatures for 2 h. Samples CKHP600-2, CKHP700-2 and CKHP800-2 have no pores larger than 15 Å. Largest pores for CKHP900-2 and CKHP1000-2 are up to 30 Å and 40 Å, respectively, although even for these samples, only a small proportion of pores are larger than 15 Å.

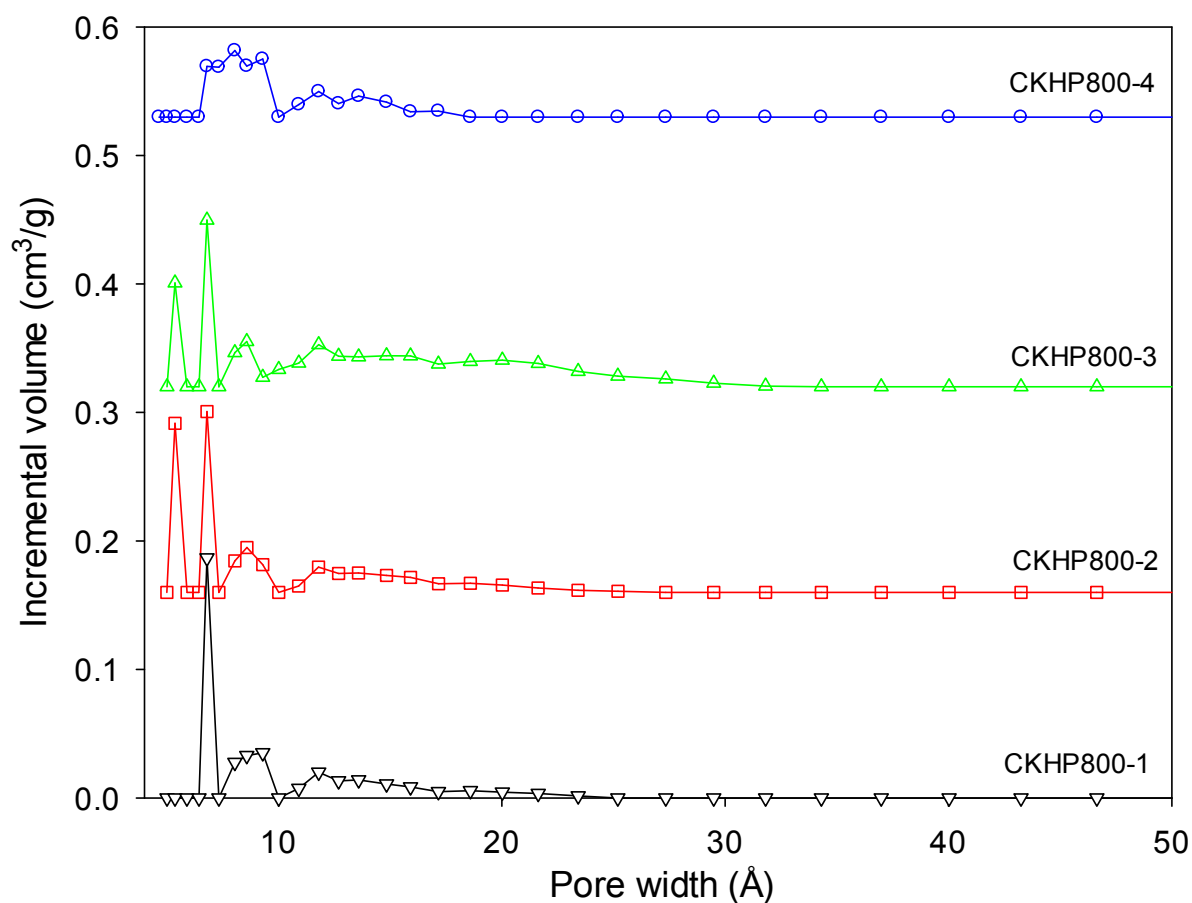

**Supporting Figure S4.** Pore size distribution curves of CKHP carbons derived from potassium hydrogen phthalate (KHP) via carbonisation at 800 °C for between 1 and 4 h. Samples CKHP800-1, CKHP800-2 and CKHP800-4 have no pores larger than ca. 15 Å. For sample CKHP800-3 the largest pores are up to 30 Å, though only a small proportion of pores are larger than 15 Å.

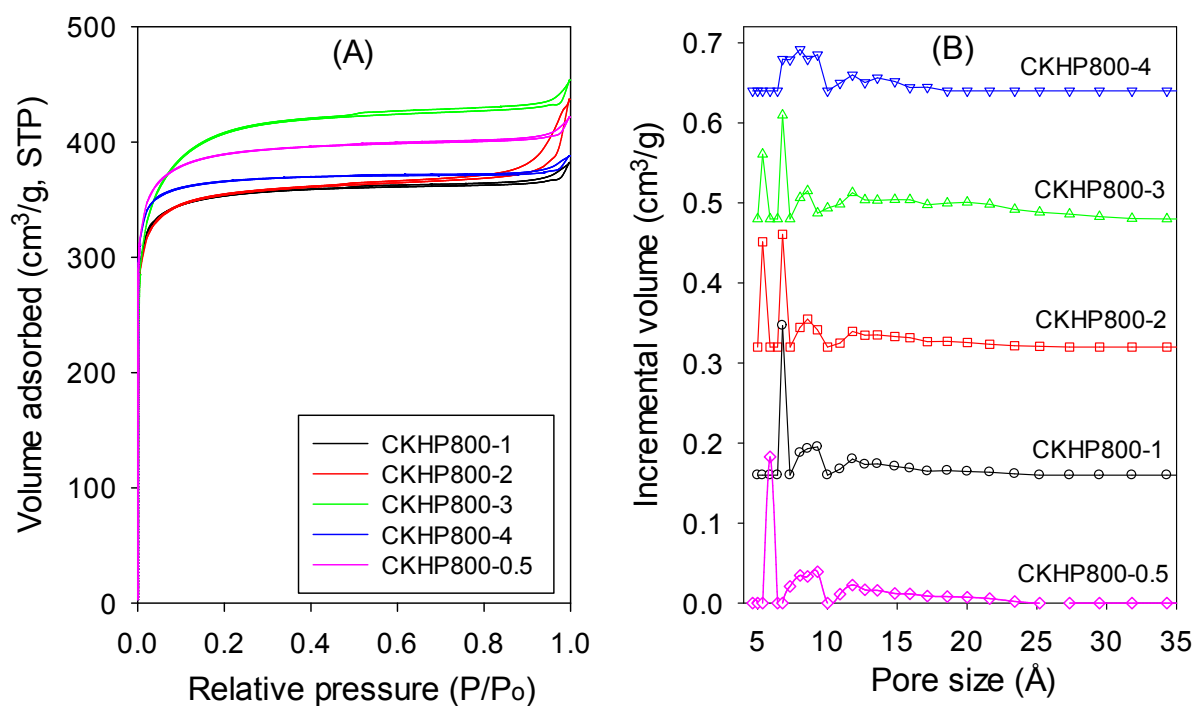

**Supporting Figure S5.** Nitrogen sorption isotherms (A) and corresponding pore size distribution curves (B) of CKHP carbons derived from potassium hydrogen phthalate (KHP) via carbonisation at 800 °C for various periods of time, from as low as 0.5 h to 4 h. The isotherm and pore size distribution of the sample carbonised for 0.5 h is largely similar to the other CKHP800-y samples. The pore size distribution of CKHP800-0.5 exhibits maxima at 6 and 8.5 Å, which is very similar to sample CKHP800-1.

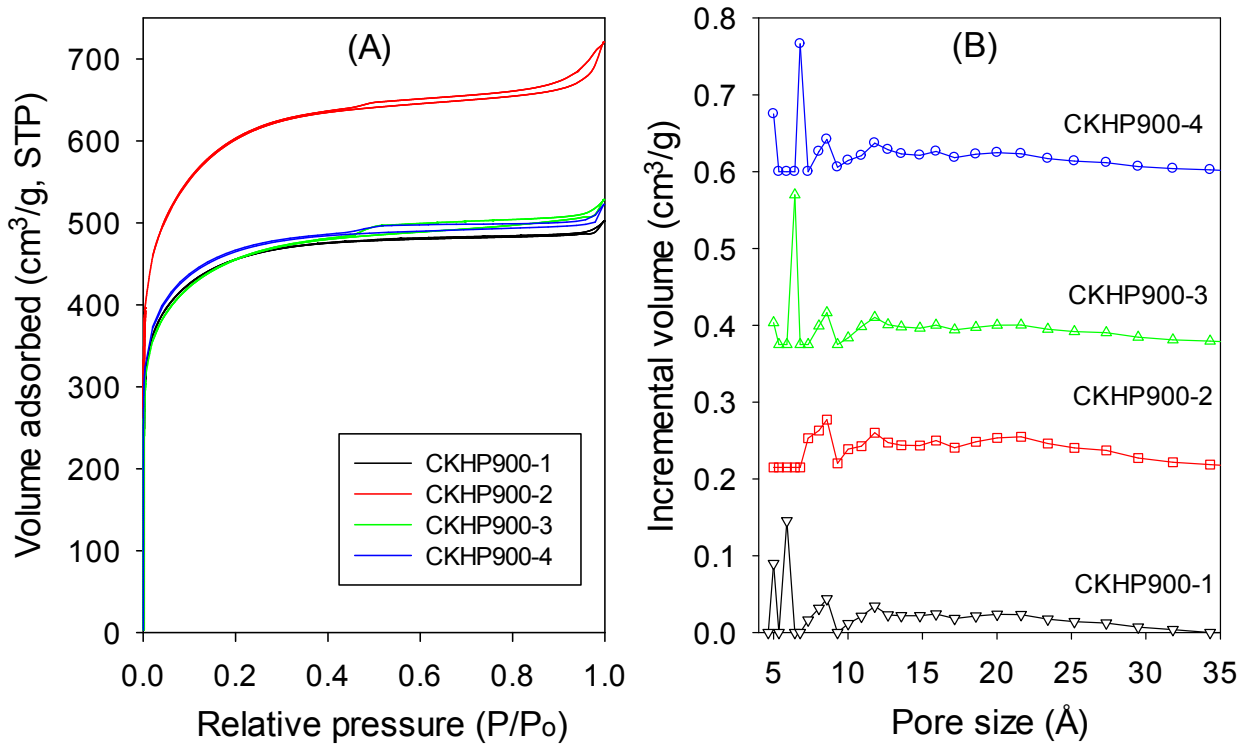

**Supporting Figure S6.** Nitrogen sorption isotherms (A) and corresponding pore size distribution curves (B) of CKHP carbons derived from potassium hydrogen phthalate (KHP) via carbonisation at 900 °C for various periods of time.

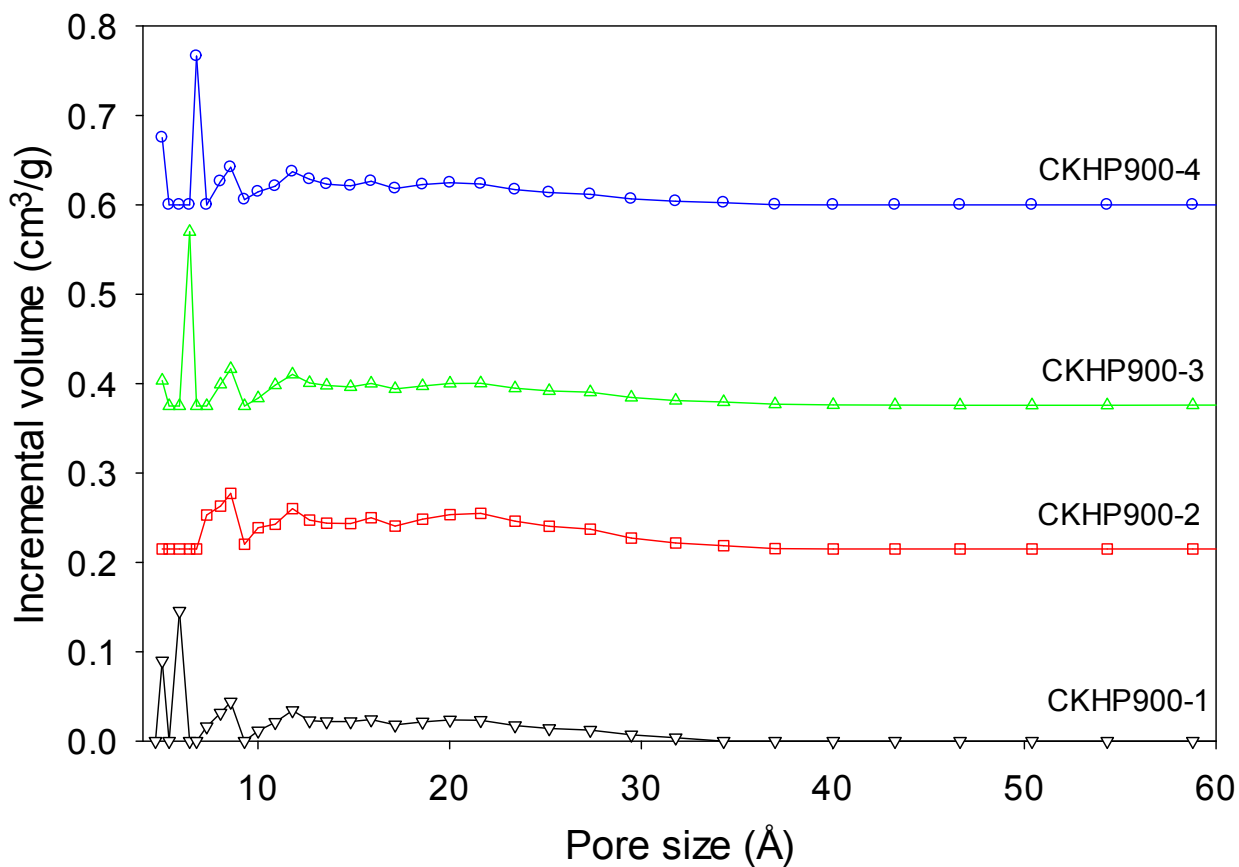

**Supporting Figure S7.** Pore size distribution curves of CKHP carbons derived from potassium hydrogen phthalate (KHP) via carbonisation at 900 °C for between 1 and 4 h. The largest pores in all samples are up to 35 Å, and a significant proportion of pores are larger than 15 Å.



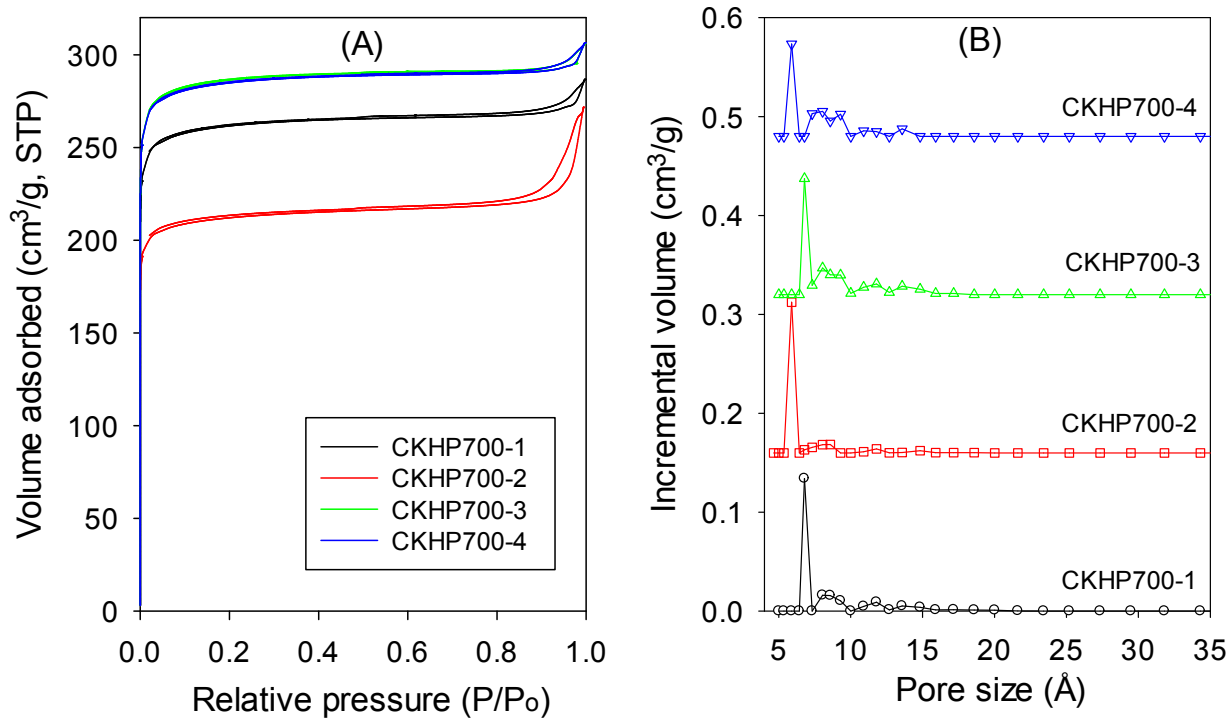

**Supporting Figure S8.** Nitrogen sorption isotherms (A) and corresponding pore size distribution curves (B) of CKHP carbons derived from potassium hydrogen phthalate (KHP) via carbonisation at 700 °C for various periods of time.

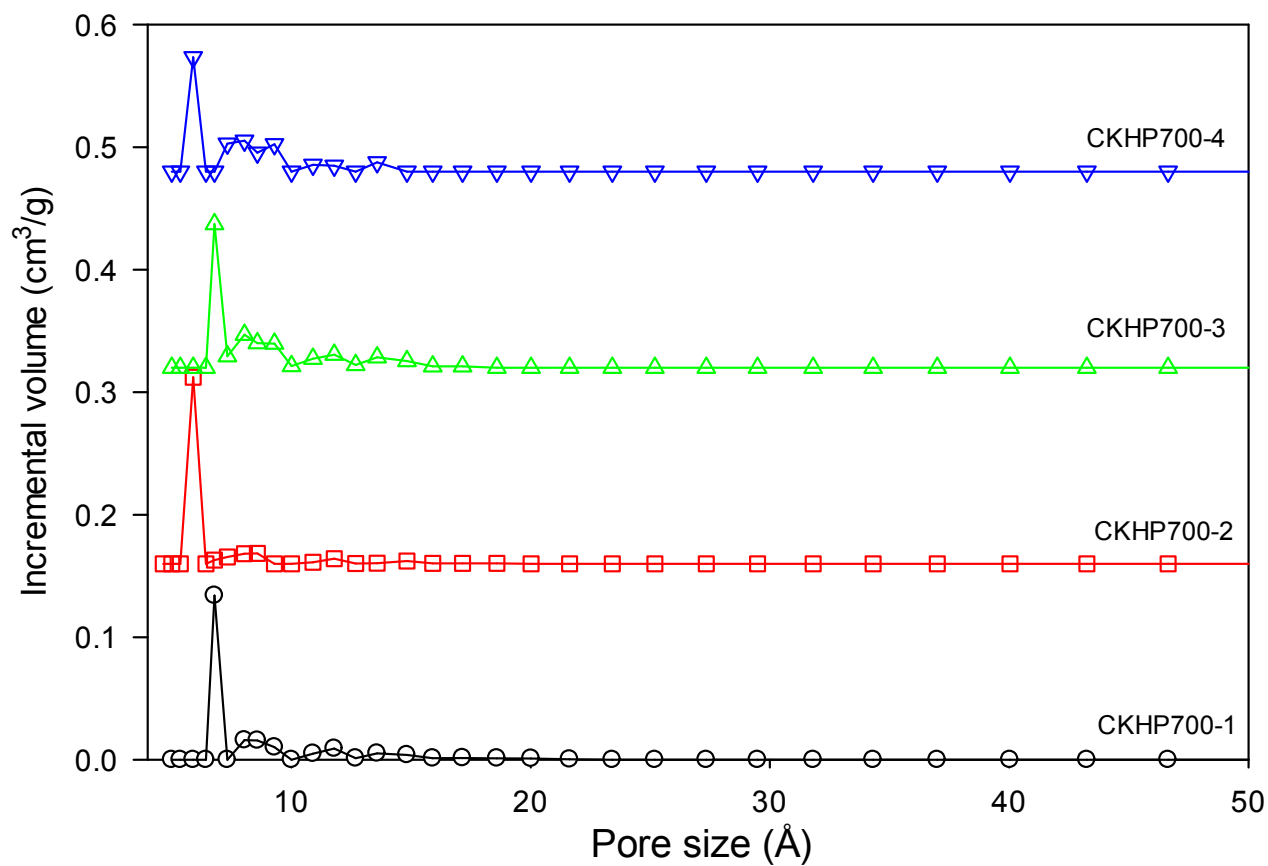

**Supporting Figure S9.** Pore size distribution curves of CKHP carbons derived from potassium hydrogen phthalate (KHP) via carbonisation at 700 °C for between 1 and 4 h. The CKHP700-x samples have virtually no pores larger than 10 Å.

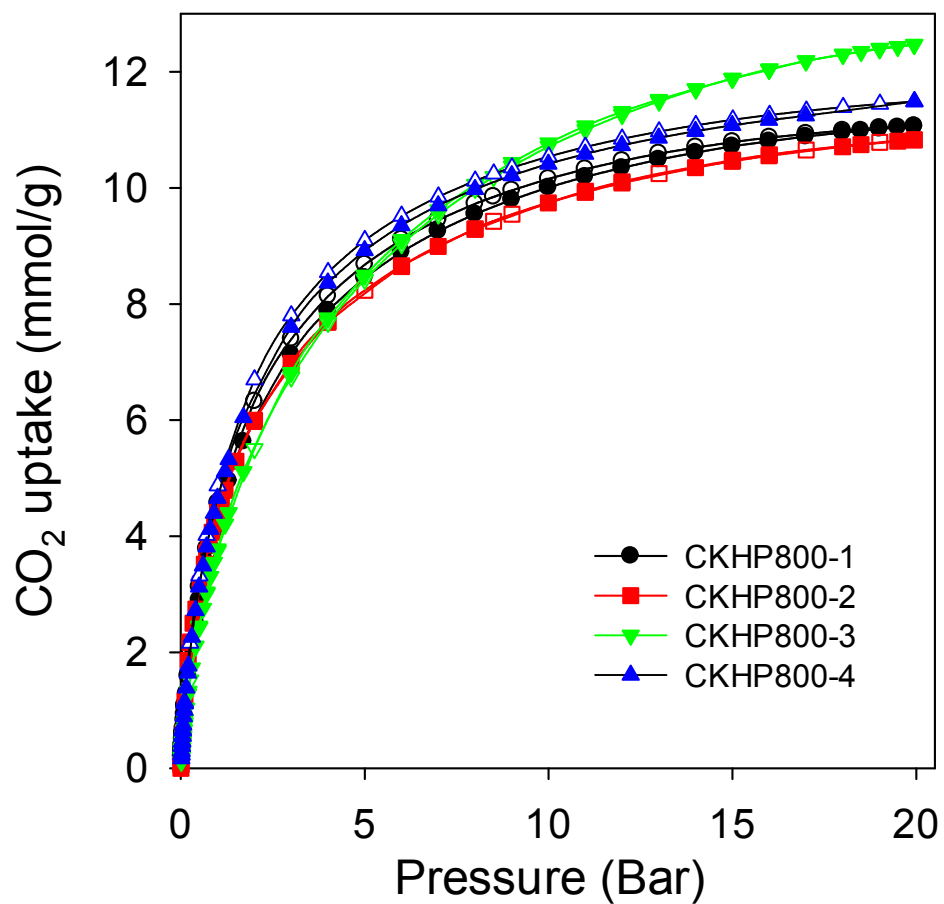

**Supporting Figure S10.** CO<sub>2</sub> uptake isotherms at 25 °C and 0 – 20 bar for CKHP carbons derived from potassium hydrogen phthalate (KHP) via carbonisation at 800 °C for 1 to 4 h.

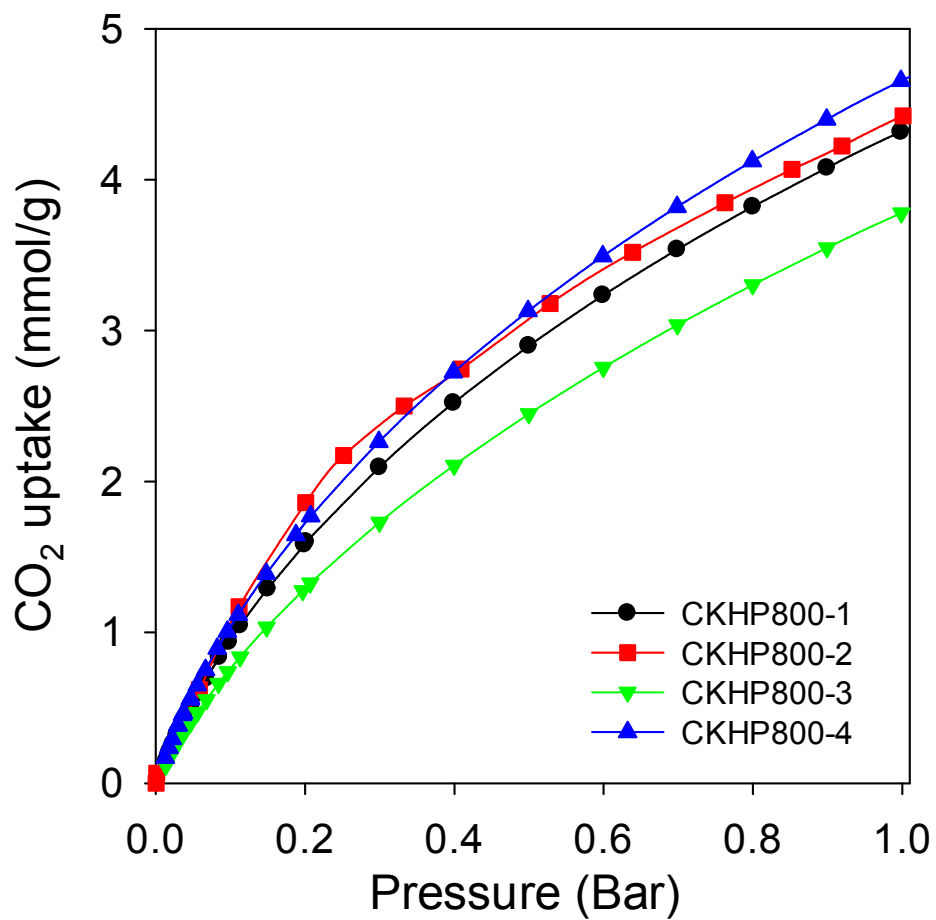

**Supporting Figure S11.** Low pressure CO<sub>2</sub> uptake isotherms at 25 °C for CKHP carbons derived from potassium hydrogen phthalate (KHP) via carbonisation at 800 °C for 1 to 4 h.

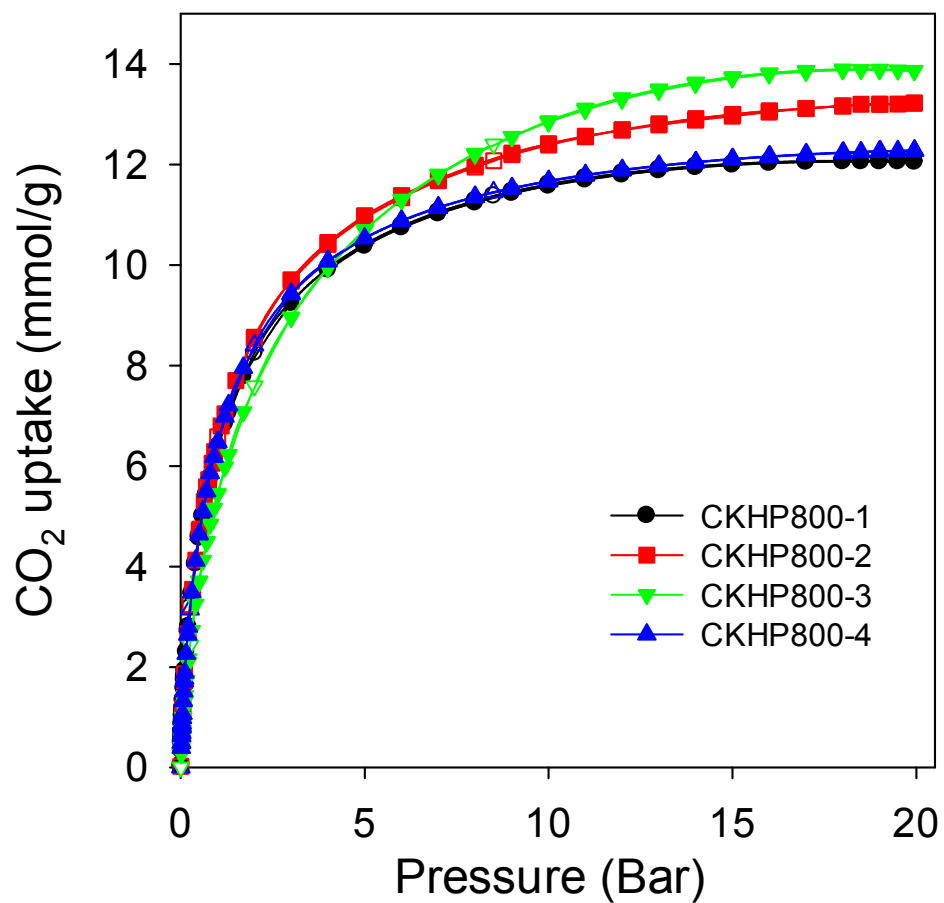

**Supporting Figure S12.** CO<sub>2</sub> uptake isotherms at 0 °C and 0 – 20 bar for CKHP carbons derived from potassium hydrogen phthalate (KHP) via carbonisation at 800 °C for 1 to 4 h.

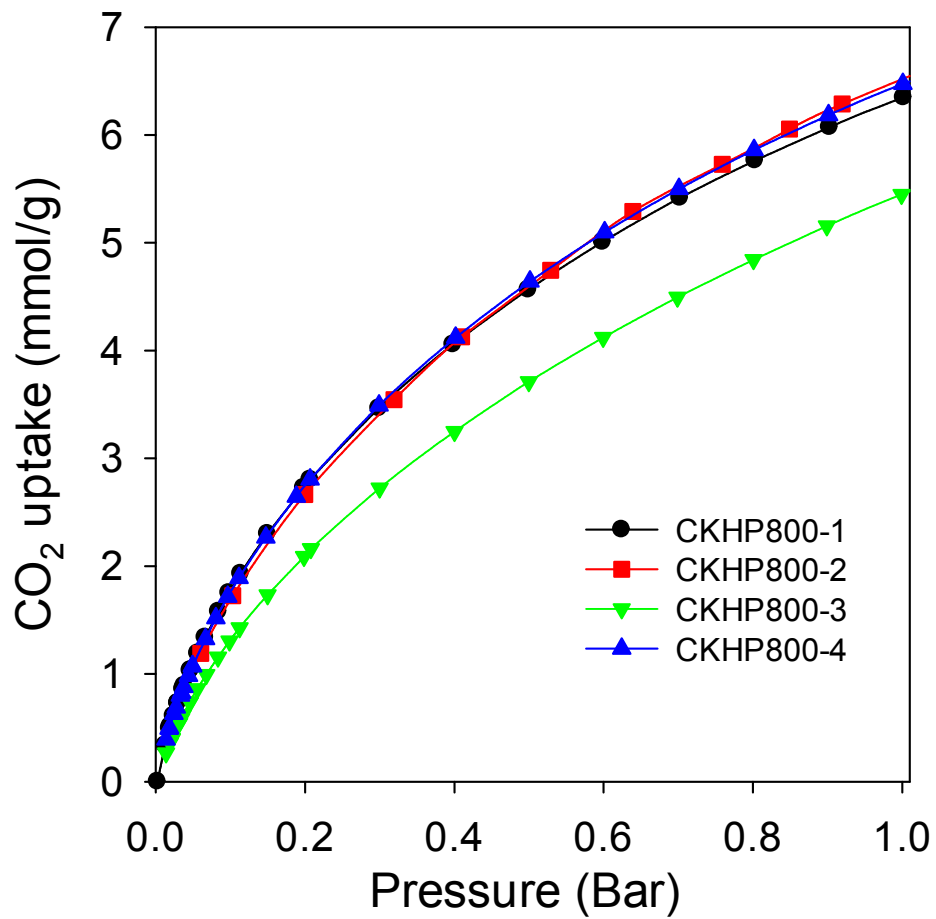

**Supporting Figure S13.** Low pressure CO<sub>2</sub> uptake isotherms at 0 °C for CKHP carbons derived from potassium hydrogen phthalate (KHP) via carbonisation at 800 °C for 1 to 4 h.

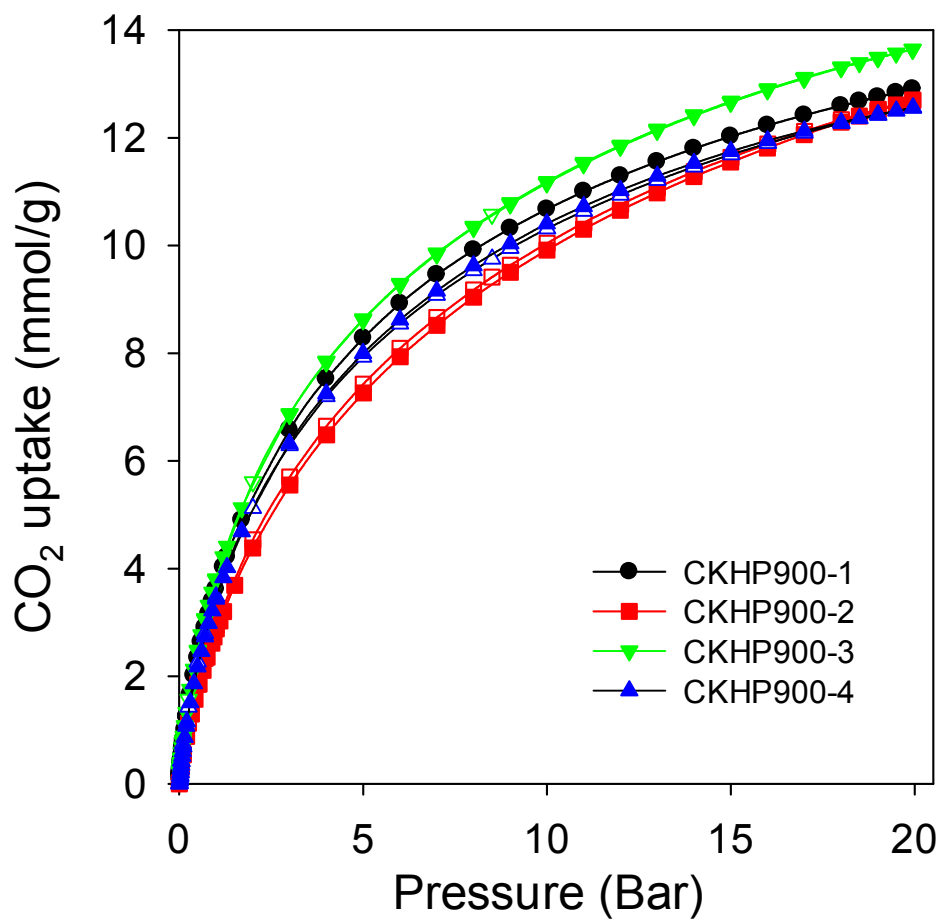

**Supporting Figure S14.** CO<sub>2</sub> uptake isotherms at 25 °C and 0-20 bar for CKHP carbons derived from potassium hydrogen phthalate (KHP) via carbonisation at 900 °C for 1 to 4 h.

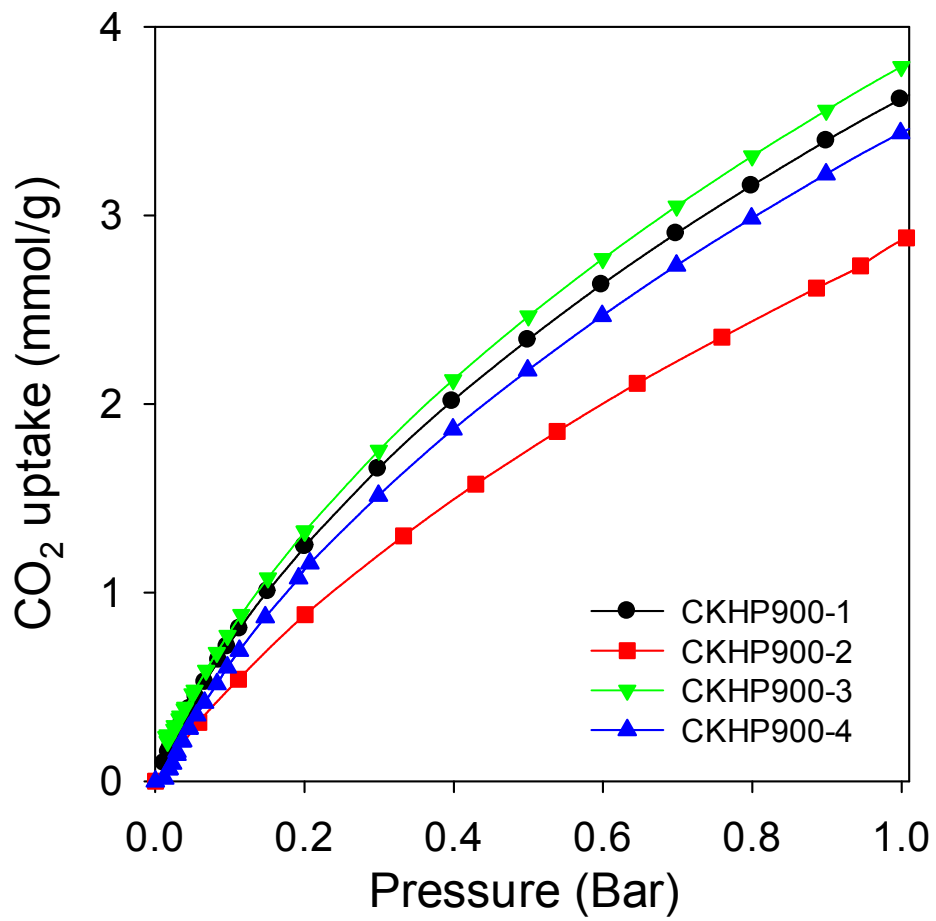

**Supporting Figure S15.** Low pressure CO<sub>2</sub> uptake isotherms at 25 °C for CKHP carbons derived from potassium hydrogen phthalate (KHP) via carbonisation at 900 °C for 1 to 4 h.



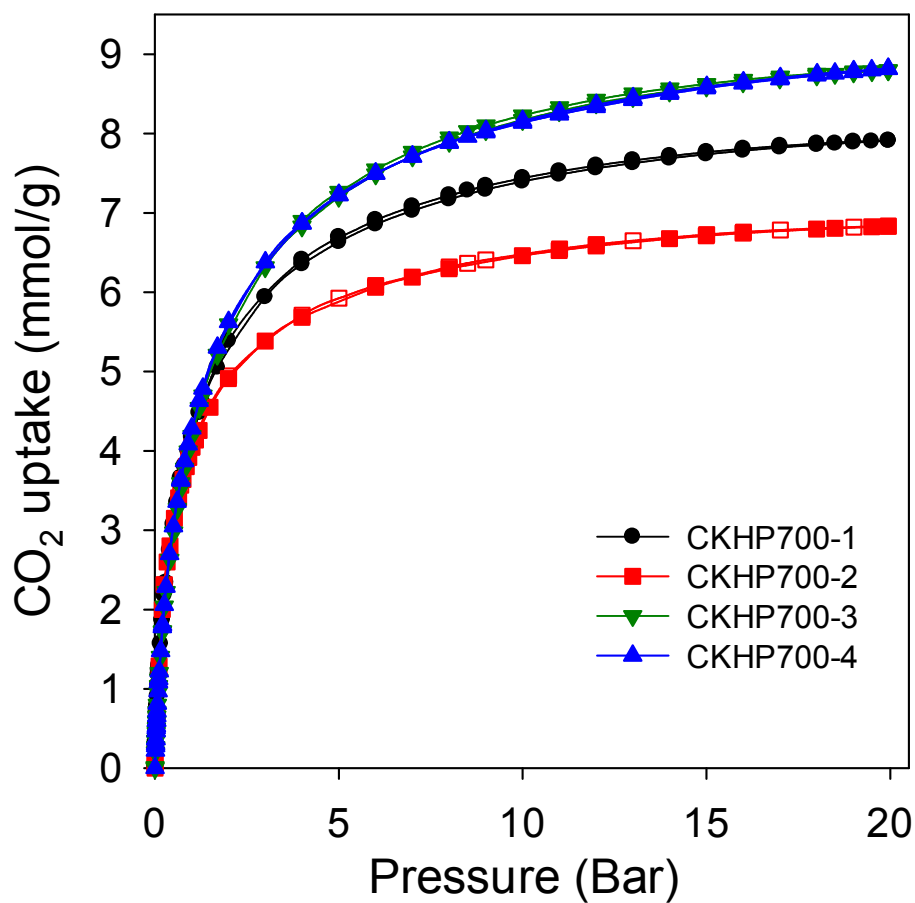

**Supporting Figure S16.** CO<sub>2</sub> uptake isotherms at 25 °C and 0 – 20 bar for CKHP carbons derived from potassium hydrogen phthalate (KHP) via carbonisation at 700 °C for 1 to 4 h.

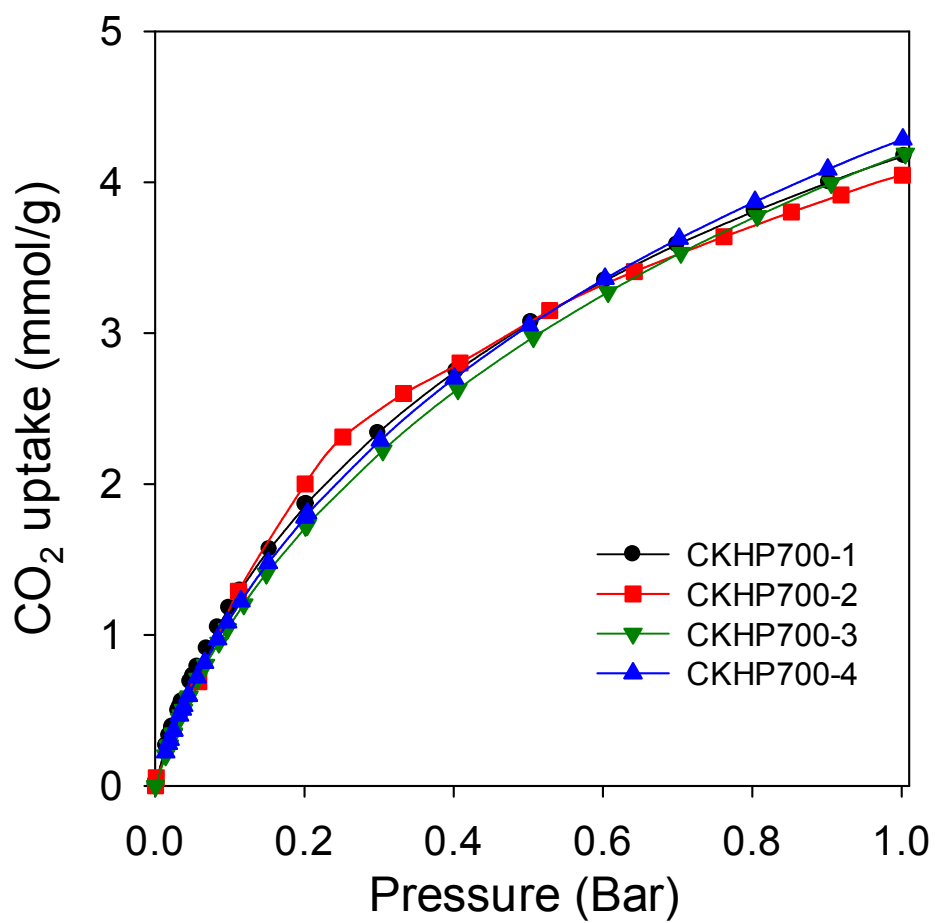

**Supporting Figure S17.** Low pressure CO<sub>2</sub> uptake isotherms at 25 °C for CKHP carbons derived from potassium hydrogen phthalate (KHP) via carbonisation at 700 °C for 1 to 4 h.

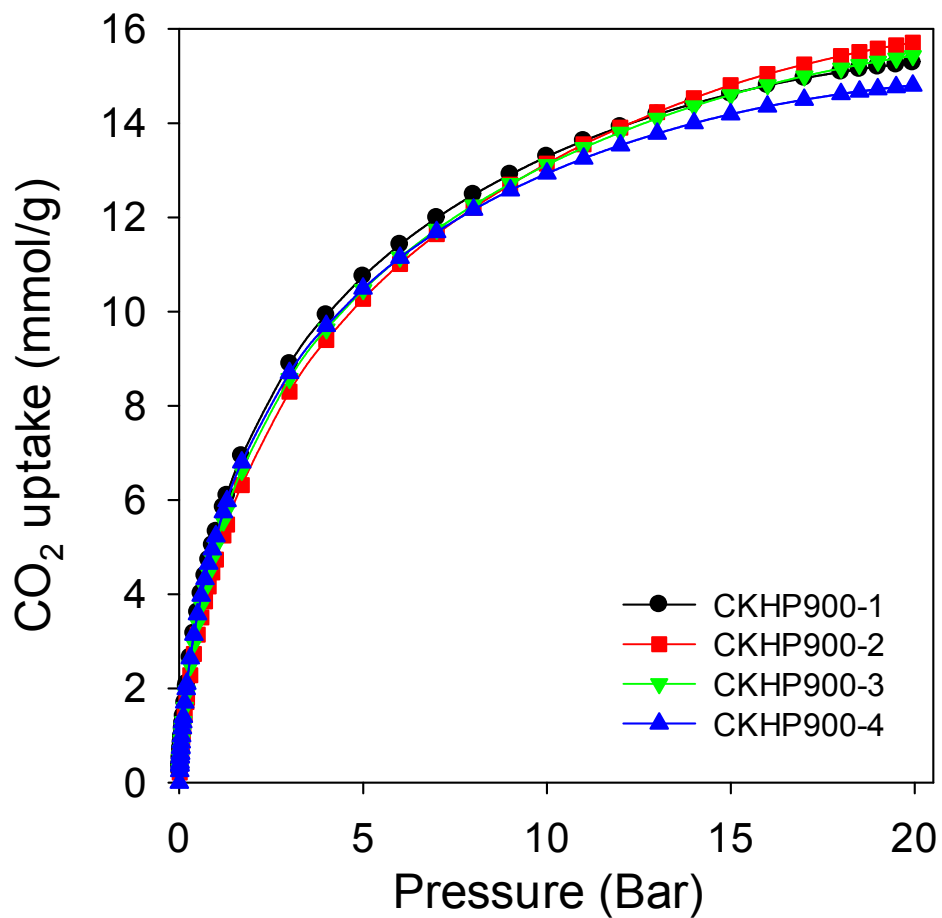

**Supporting Figure S18.** CO<sub>2</sub> uptake isotherms at 0 °C and 0 – 20 bar for CKHP carbons derived from potassium hydrogen phthalate (KHP) via carbonisation at 900 °C for 1 to 4 h.

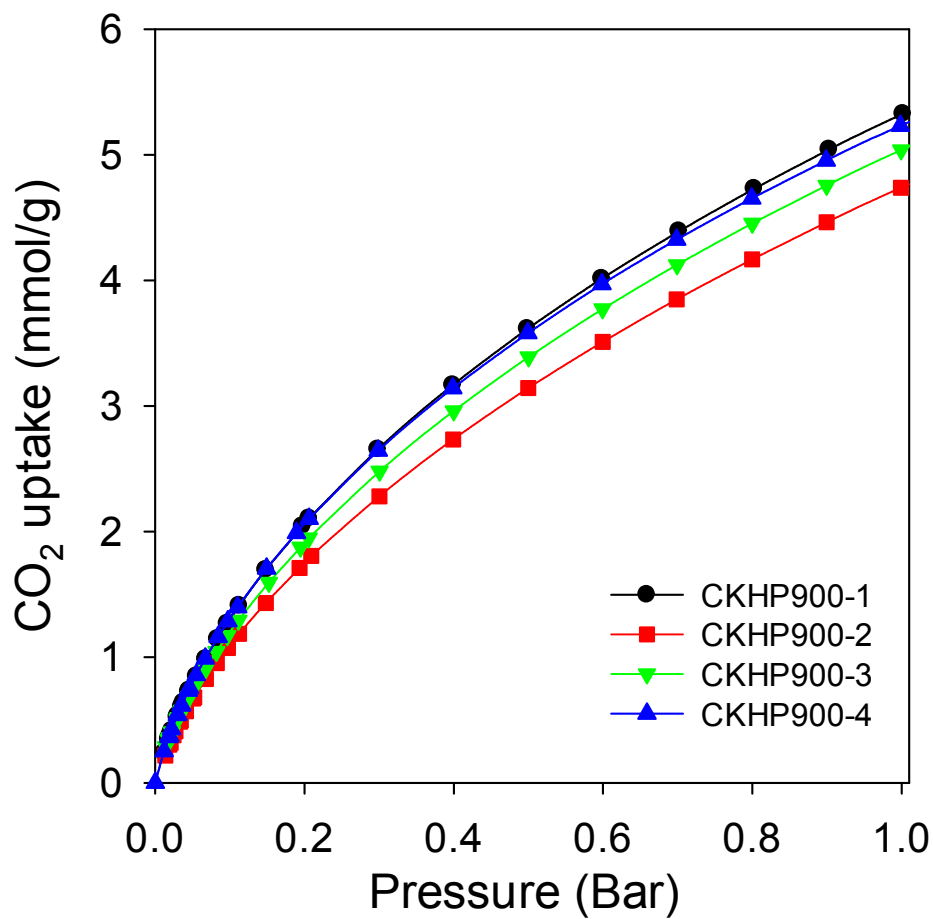

**Supporting Figure S19.** Low pressure CO<sub>2</sub> uptake isotherms at 0 °C and 0-20 bar for CKHP carbons derived from potassium hydrogen phthalate (KHP) via carbonisation at 900 °C for 1 to 4 h.

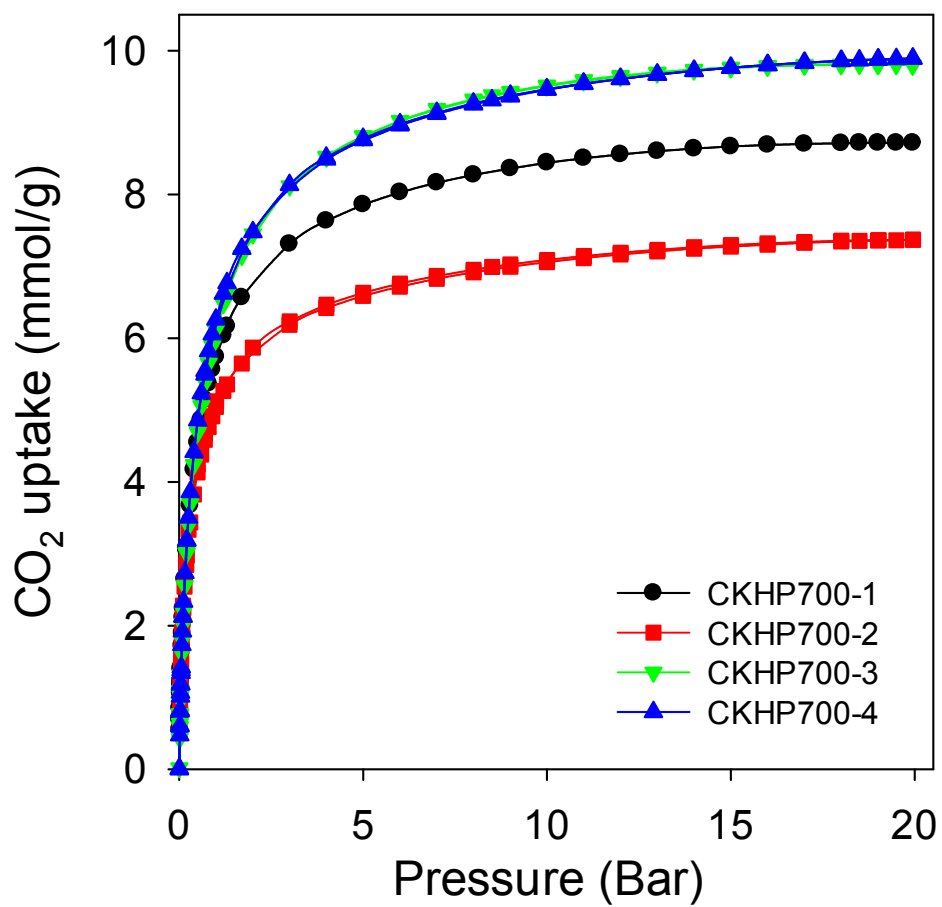

**Supporting Figure S20.** CO<sub>2</sub> uptake isotherms at 0 °C and 0 – 20 bar for CKHP carbons derived from potassium hydrogen phthalate (KHP) via carbonisation at 700 °C for 1 to 4 h.

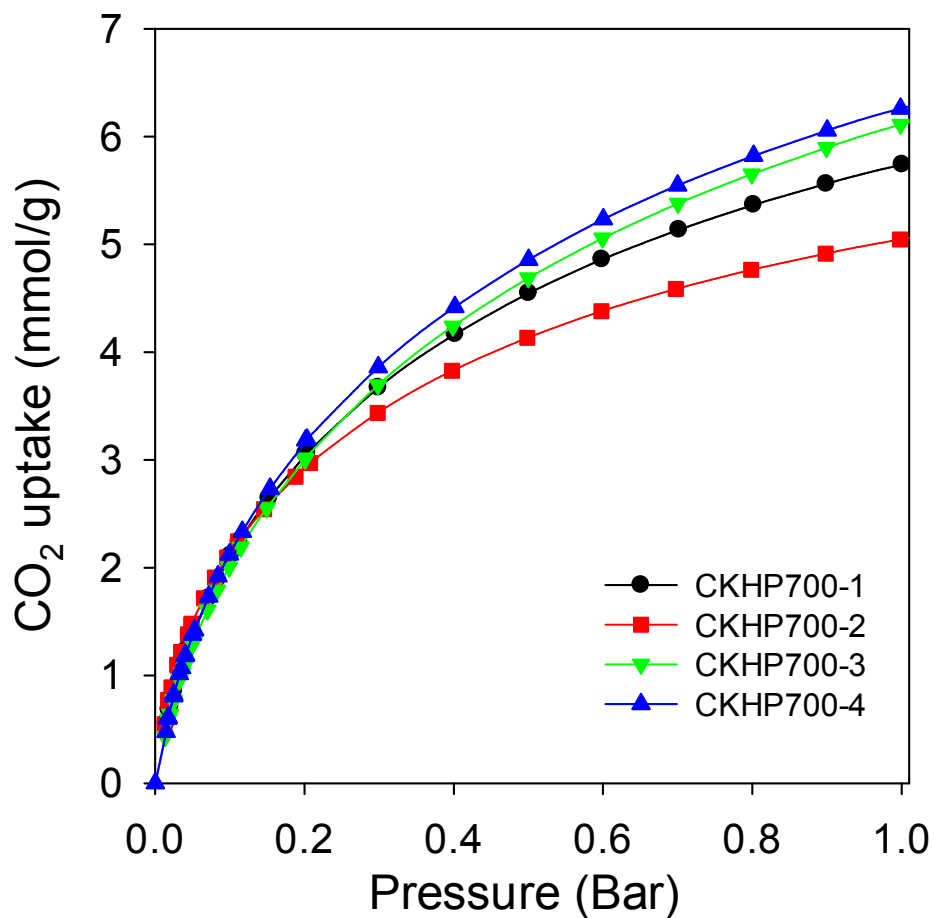

**Supporting Figure S21.** Low pressure CO<sub>2</sub> uptake isotherms at 0 °C and 0-20 bar for CKHP carbons derived from potassium hydrogen phthalate (KHP) via carbonisation at 700 °C for 1 to 4 h.

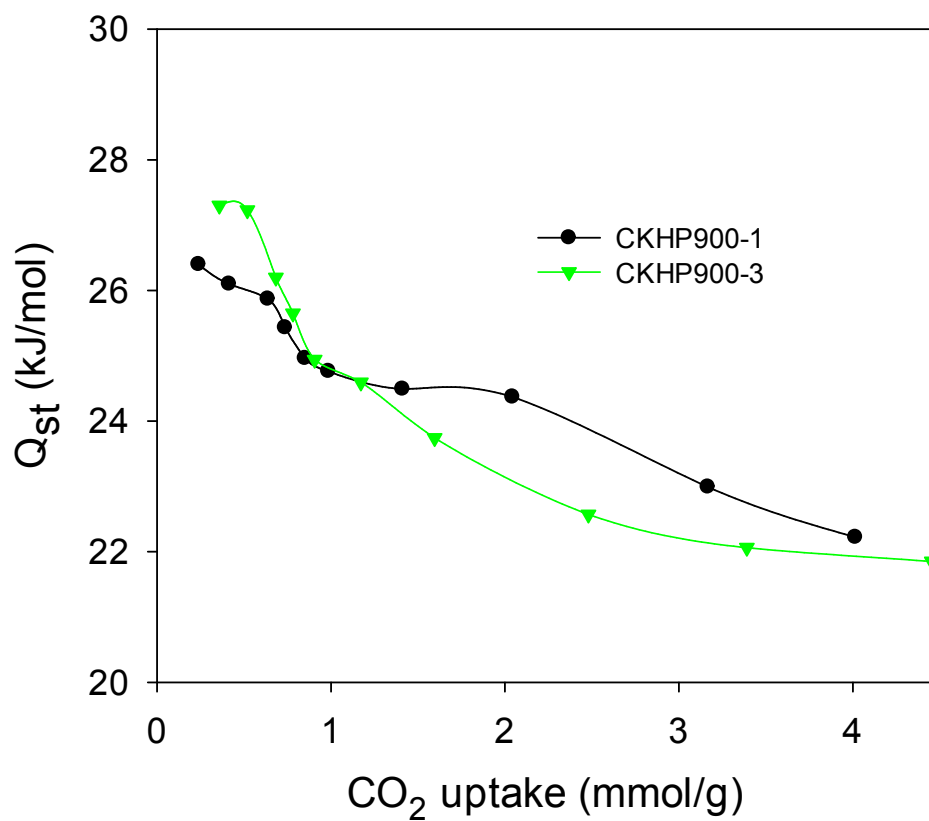

**Supporting Figure S22.** Isosteric heat of CO<sub>2</sub> adsorption ( $Q_{st}$ ) as a function of CO<sub>2</sub> uptake for CKHP carbons derived from potassium hydrogen phthalate (KHP) via carbonisation at 900 °C for 1 or 3 h.

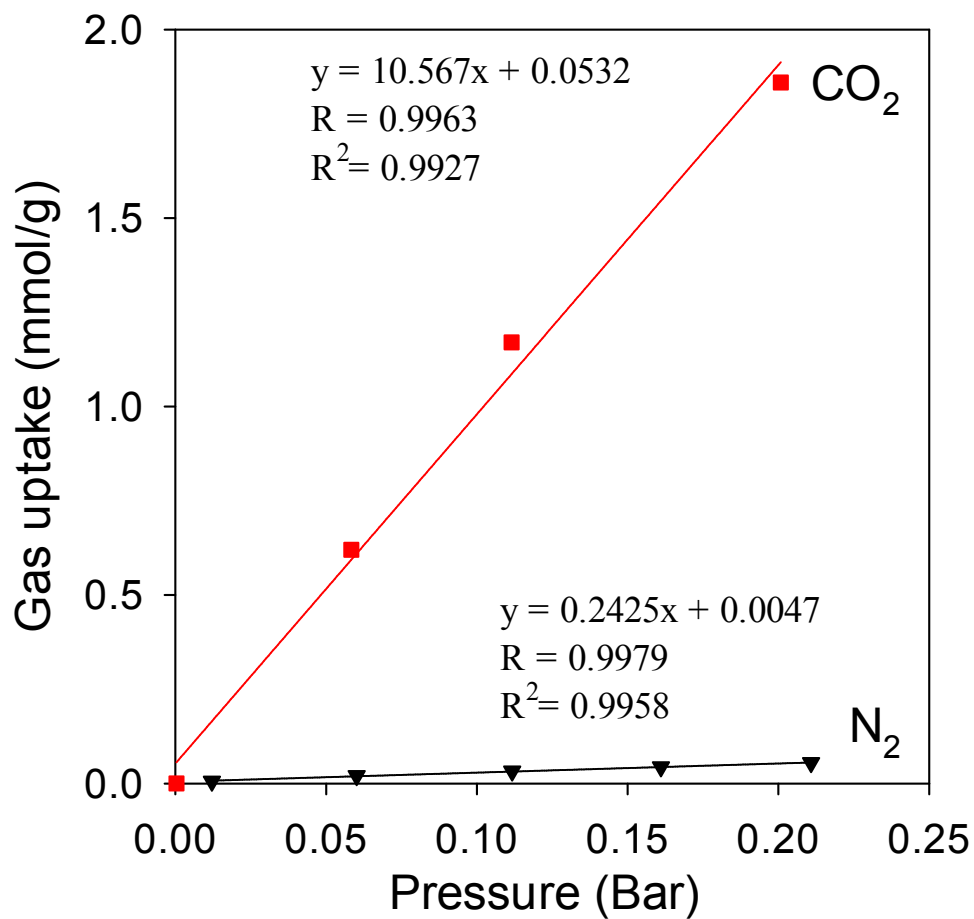

**Supporting Figure S23.** Comparison of initial rates of CO<sub>2</sub> and N<sub>2</sub> uptake at room temperature for sample CKHP800-2. The comparison gives a CO<sub>2</sub>/N<sub>2</sub> selectivity of 43.



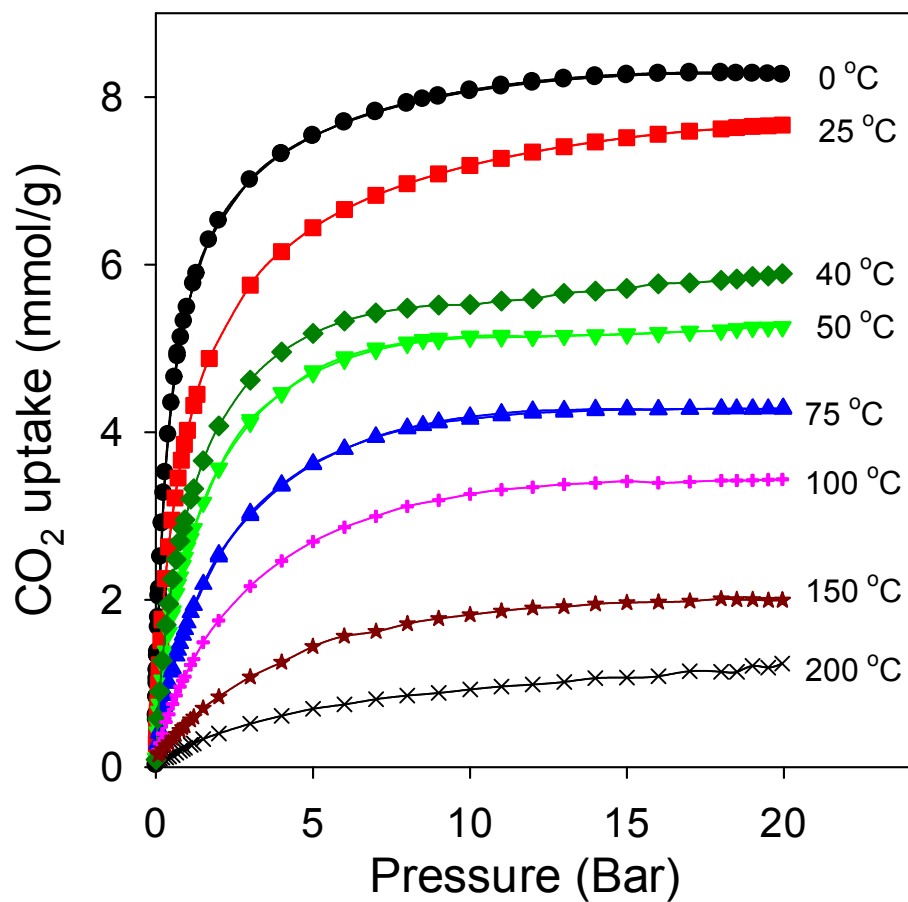

**Supporting Figure S24.** CO<sub>2</sub> uptake isotherms at various temperatures and 0 – 20 bar for sample CKHP700-1-C5.

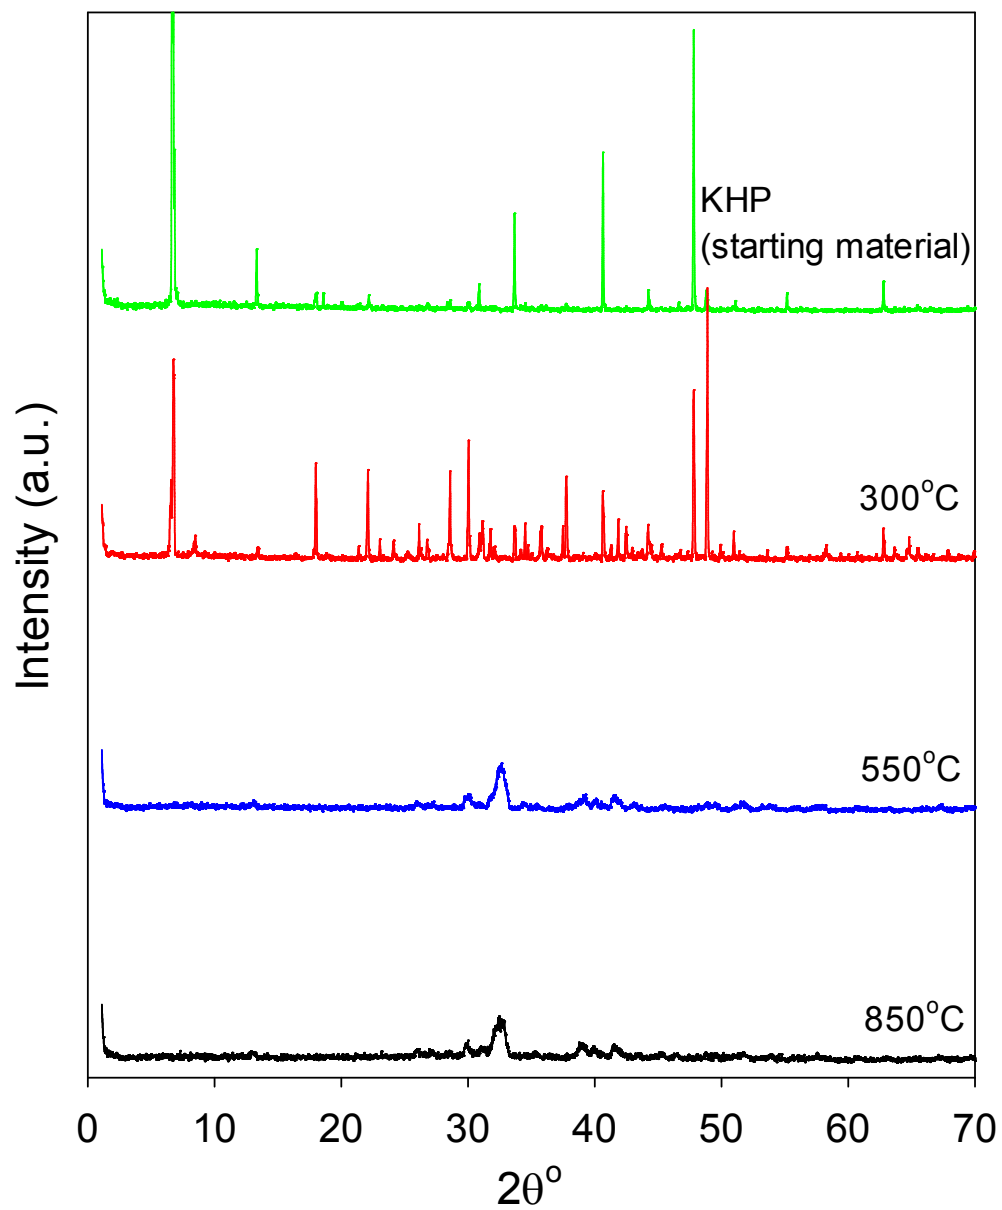

**Supporting Figure S25.** Powder XRD patterns of potassium hydrogen phthalate (KHP) salt and carbonisation products under nitrogen at various temperatures.

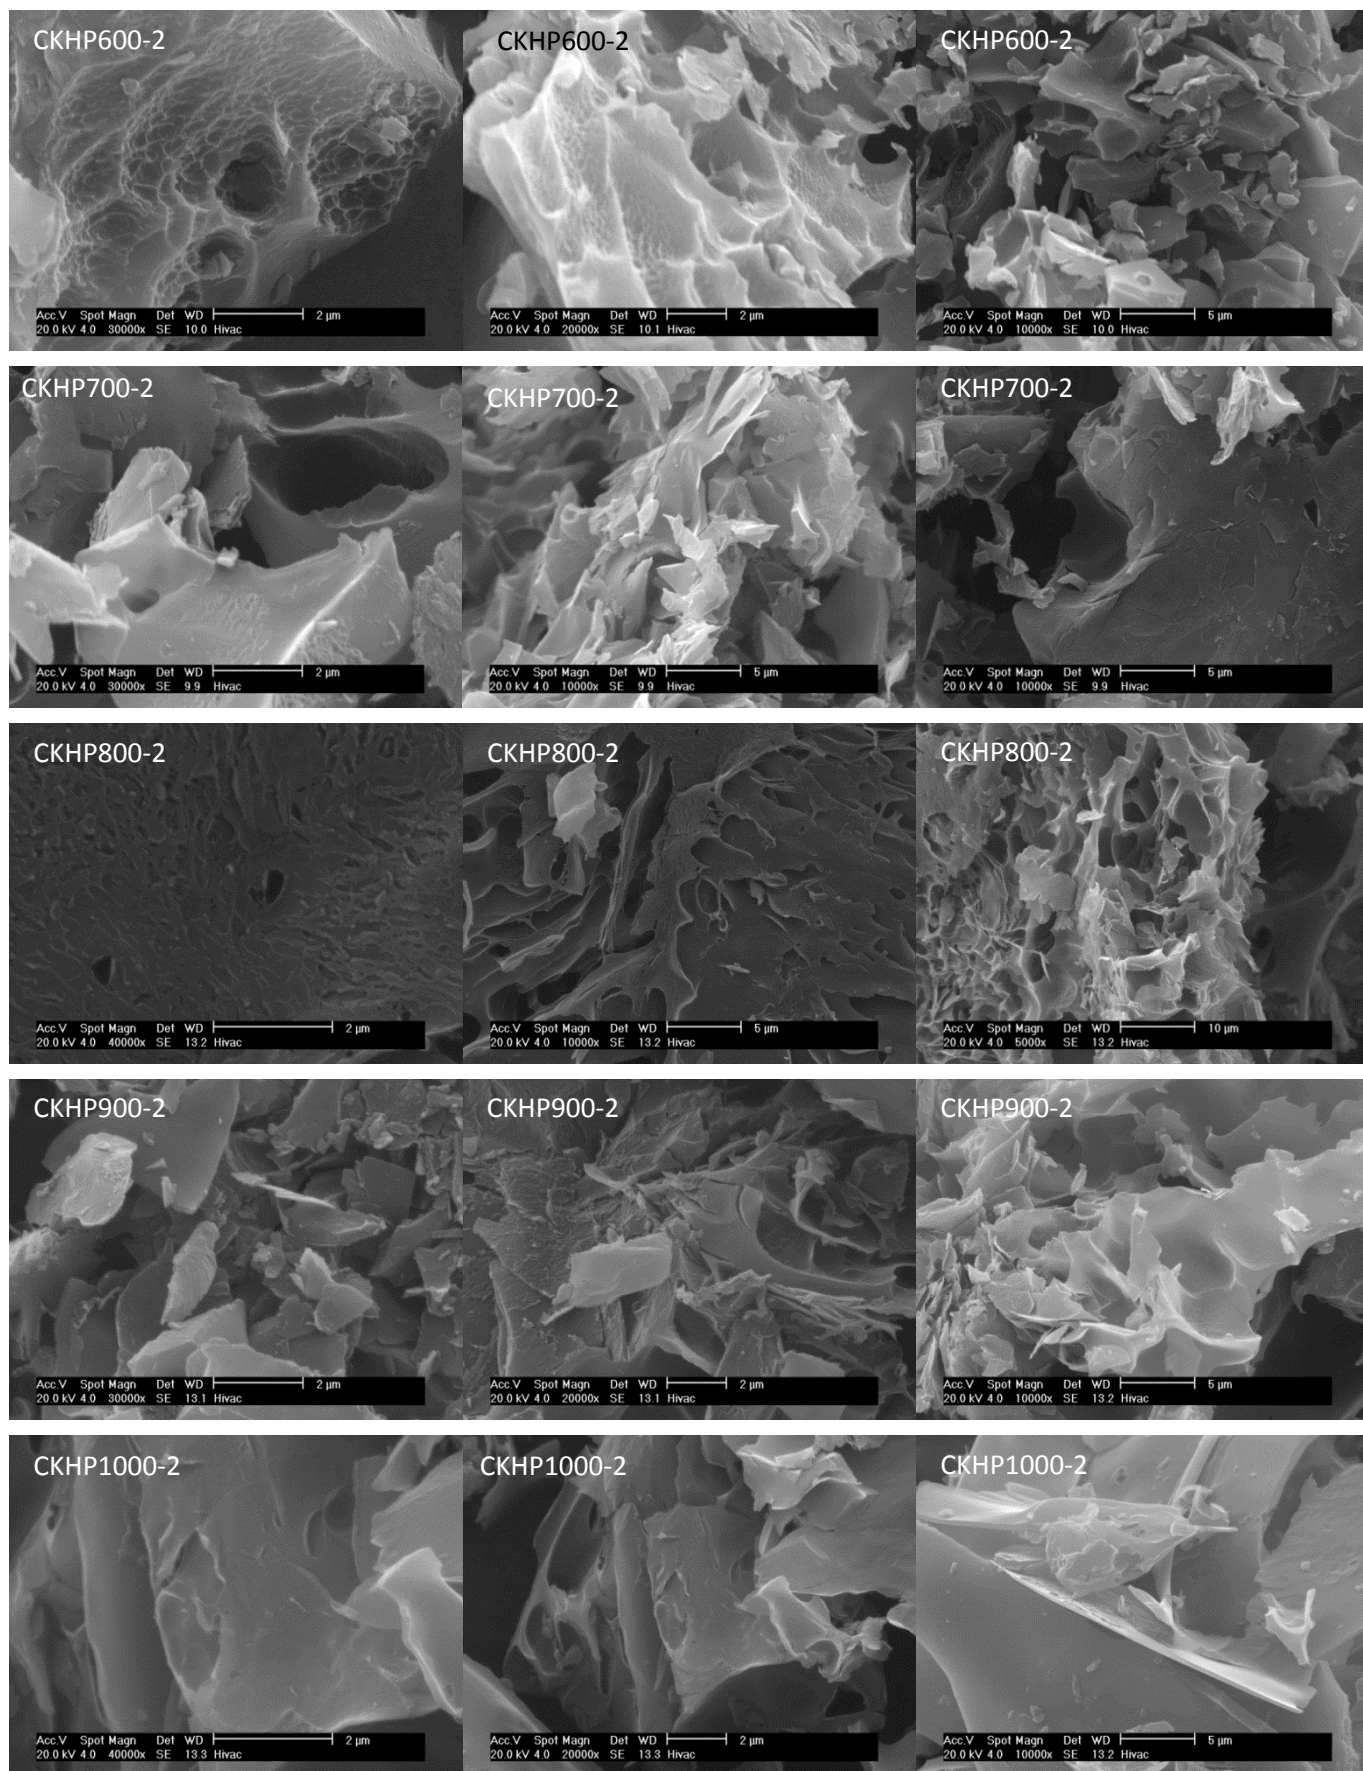

**Supporting Figure S26.** SEM images of CKHP carbons derived from potassium hydrogen phthalate (KHP) via carbonisation at various temperatures for 2 h.

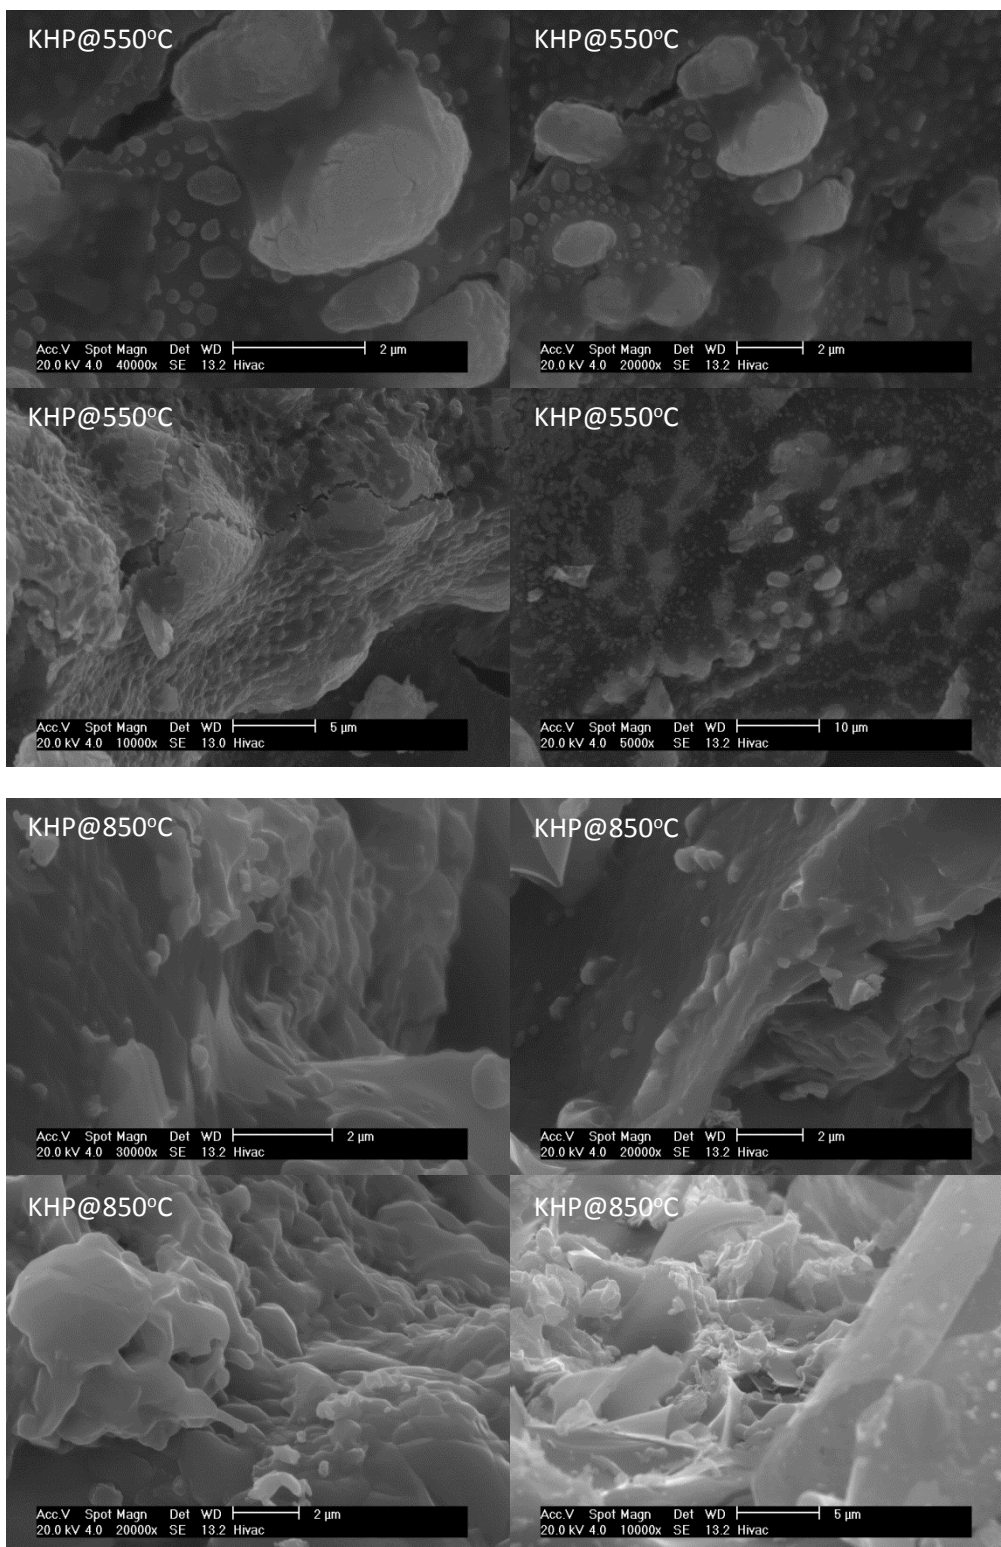

**Supporting Figure S27.** SEM images of carbonisation products of potassium hydrogen phthalate (KHP) salt under nitrogen at various temperatures. The carbonisation products are not washed.

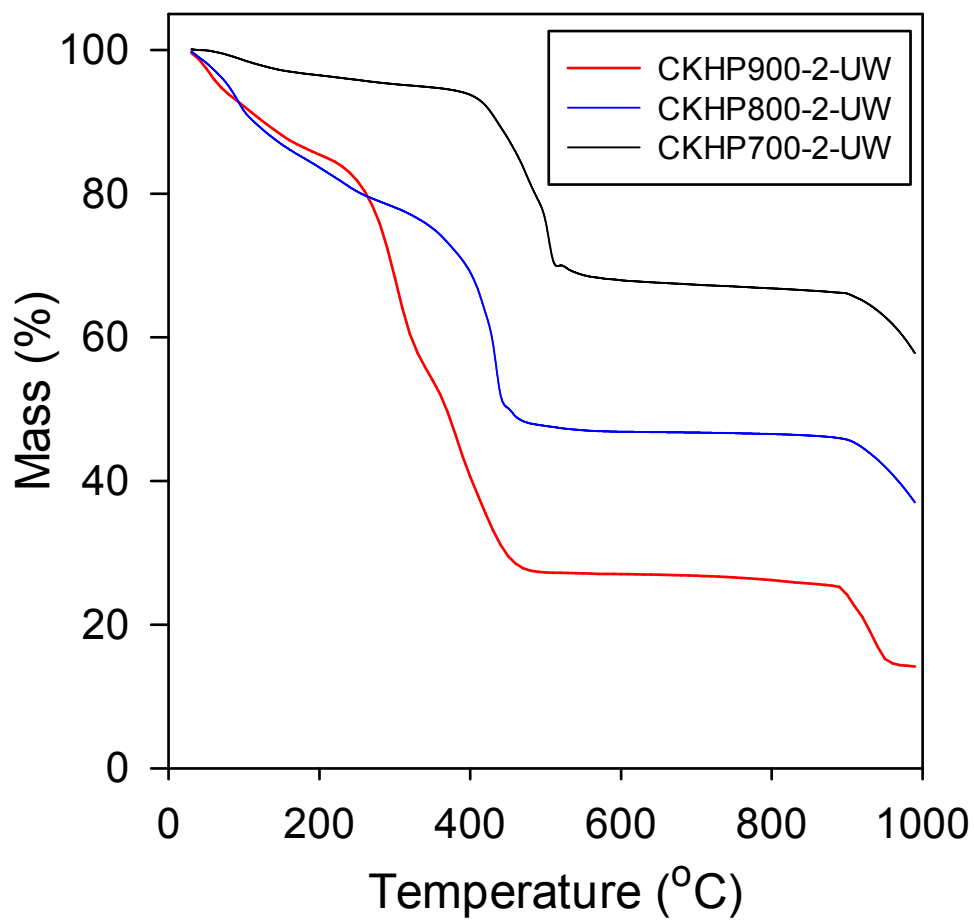

**Supporting Figure S28.** Thermogravimetric analysis (TGA) curves of unwashed CKHP carbons derived from potassium hydrogen phthalate (KHP) via carbonisation at various temperatures for 2 h.

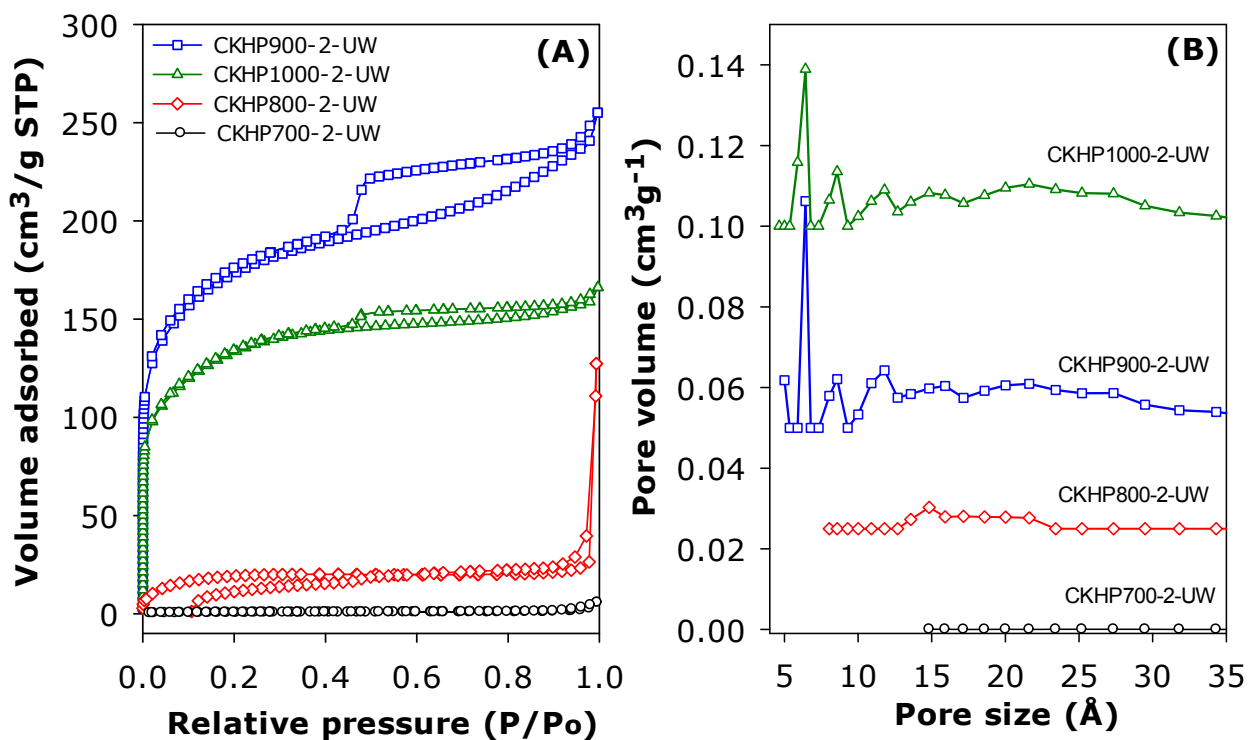

**Supporting Figure S29.** Nitrogen sorption isotherms (A) and corresponding pore size distribution curves (B) of unwashed CKHP carbons derived from potassium hydrogen phthalate (KHP) via carbonisation at various temperatures for 2 h.

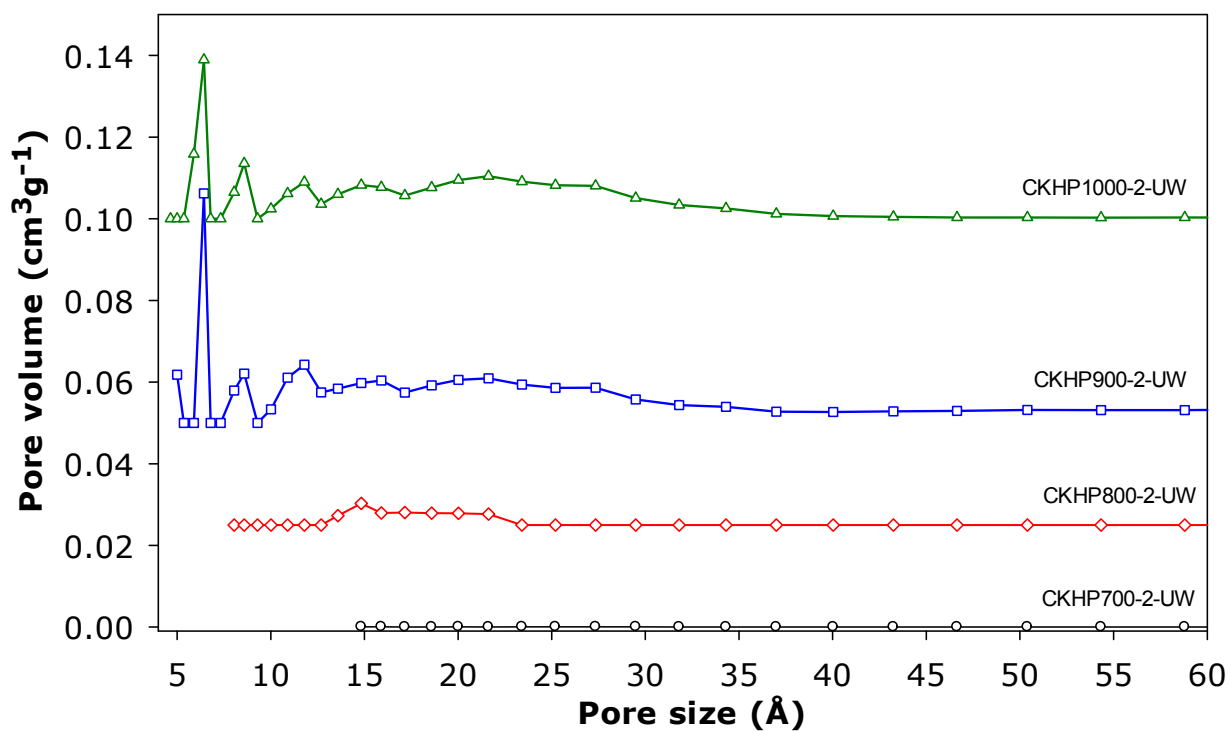

**Supporting Figure S30.** Pore size distribution curves of unwashed CKHP carbons derived from potassium hydrogen phthalate (KHP) via carbonisation at various temperatures for 2 h. Samples CKHP700-2-UW is non-porous, CKHP800-UW has hardly any pores, while the largest pores in samples CKHP900-2-UW and CKHP1000-UW are up to 35 Å.

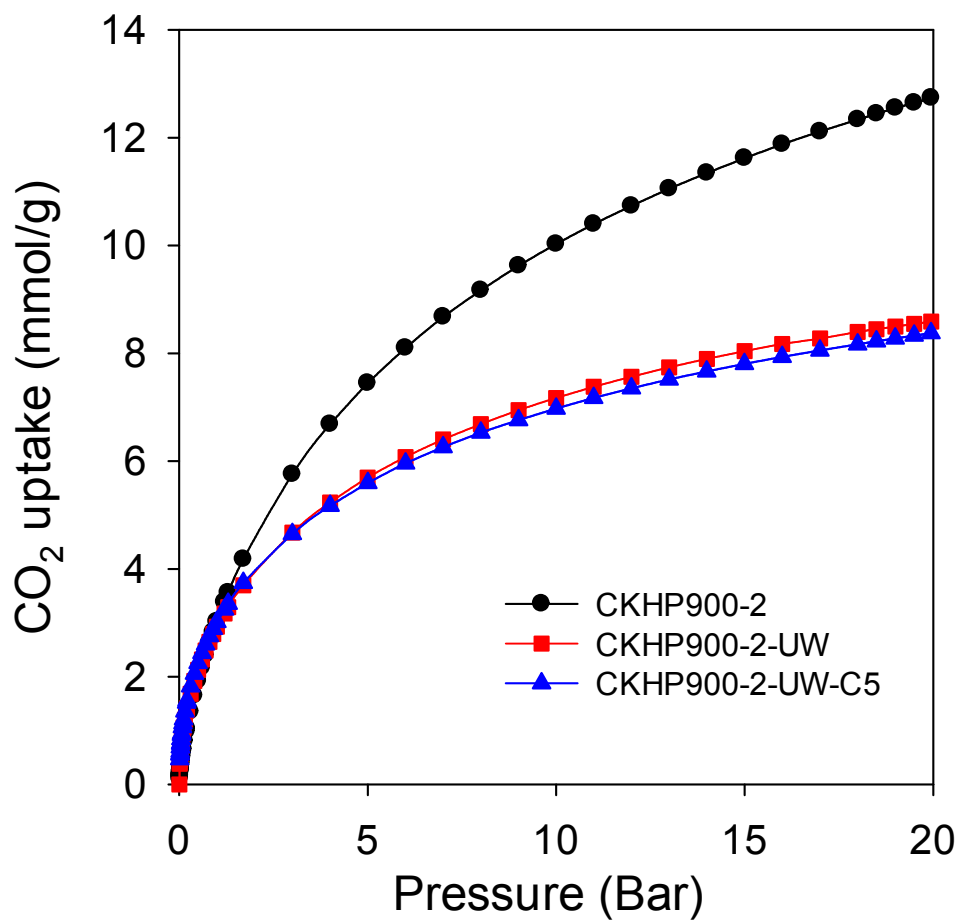

**Supporting Figure S31.** CO<sub>2</sub> uptake isotherms at 25 °C and 0 – 20 bar for washed (CKHP900-2), unwashed (CKHP900-2-UW) and unwashed compacted (CKHP900-2-UW-C5) samples carbonised at 900 °C for 2 h.



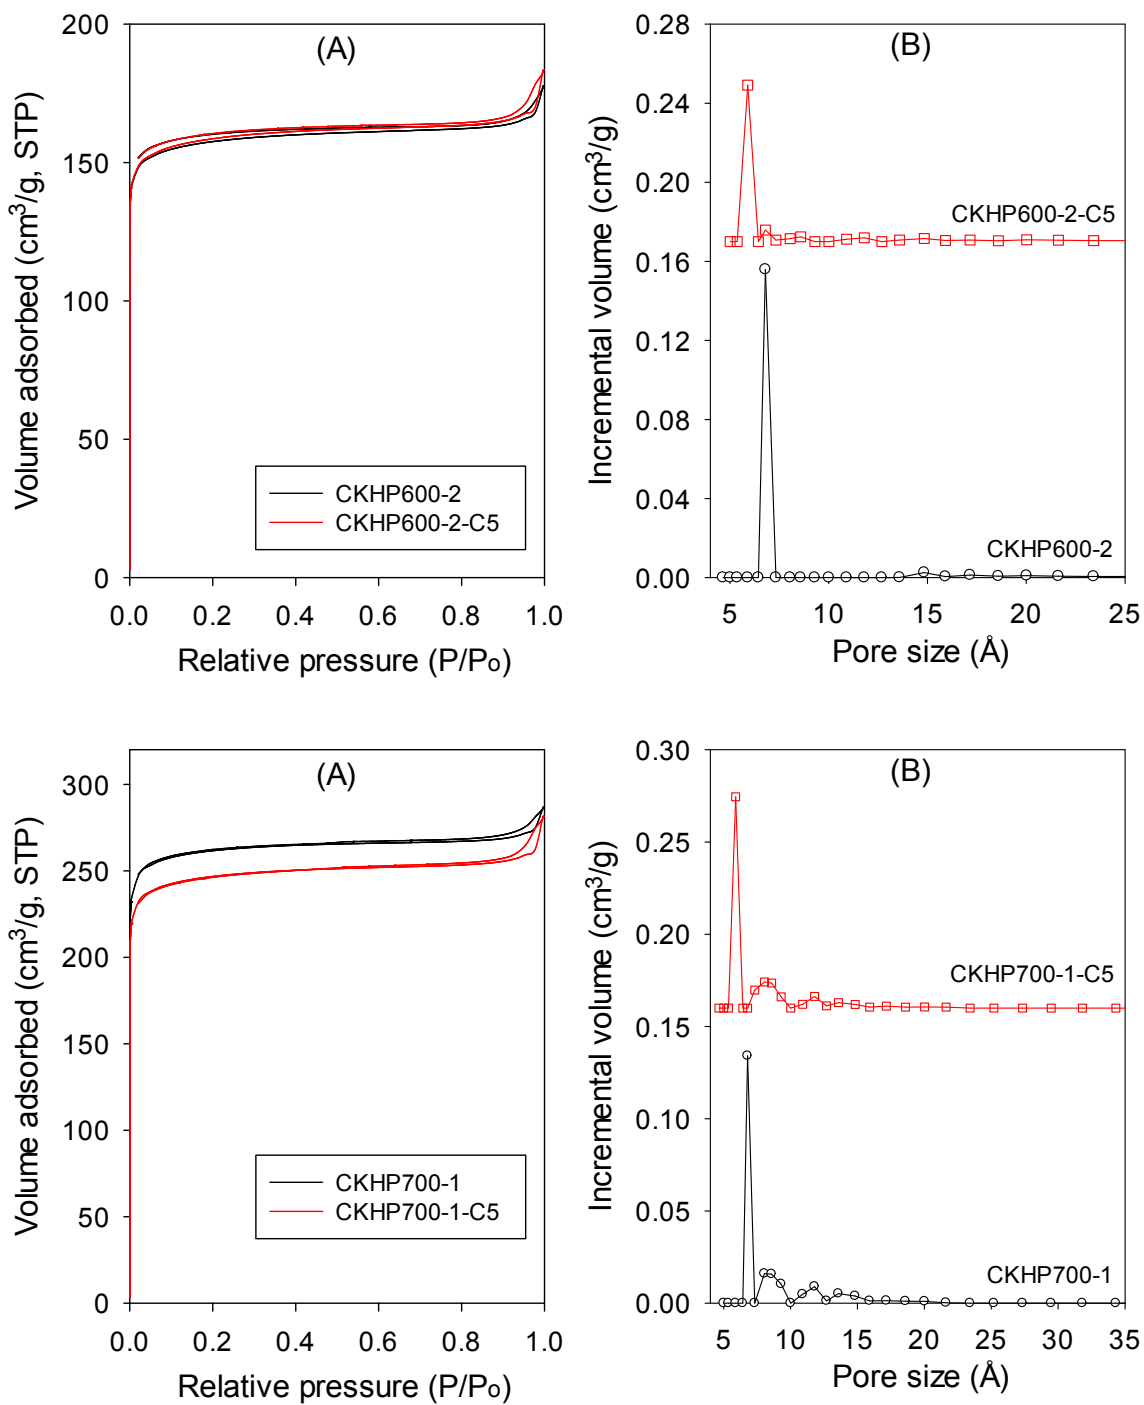

**Supporting Figure S32.** Nitrogen sorption isotherms (A) and pore size distribution curves (B) of CKHP carbons prepared at 600 °C (top) or 700 °C (bottom), before (CKHP600-2 and CKHP700-1) and after (CKHP600-2-C5 and CKHP700-1-C5) compaction at a load of 5 tons (i.e. 370 MPa).

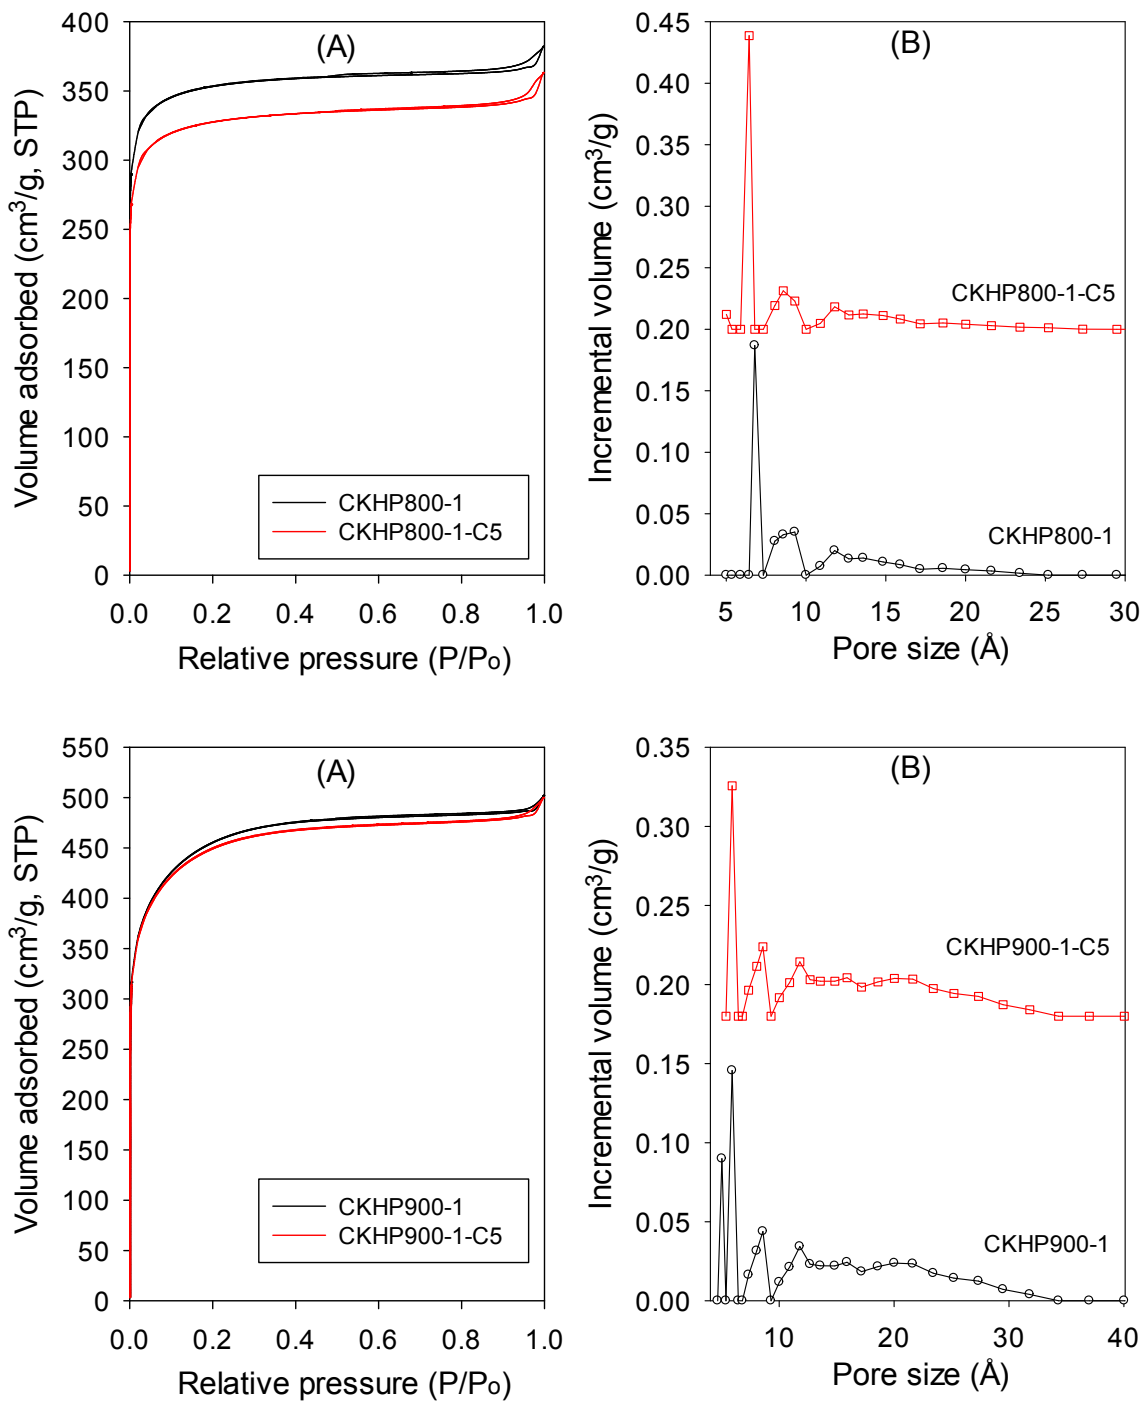

**Supporting Figure S33.** Nitrogen sorption isotherms (A) and pore size distribution curves (B) of CKHP carbons prepared at 800 °C (top) or 900 °C (bottom), before (CKHP800-1 and CKHP900-1) and after (CKHP800-1-C5 and CKHP900-1-C5) compaction at a load of 5 tons (i.e. 370 MPa).

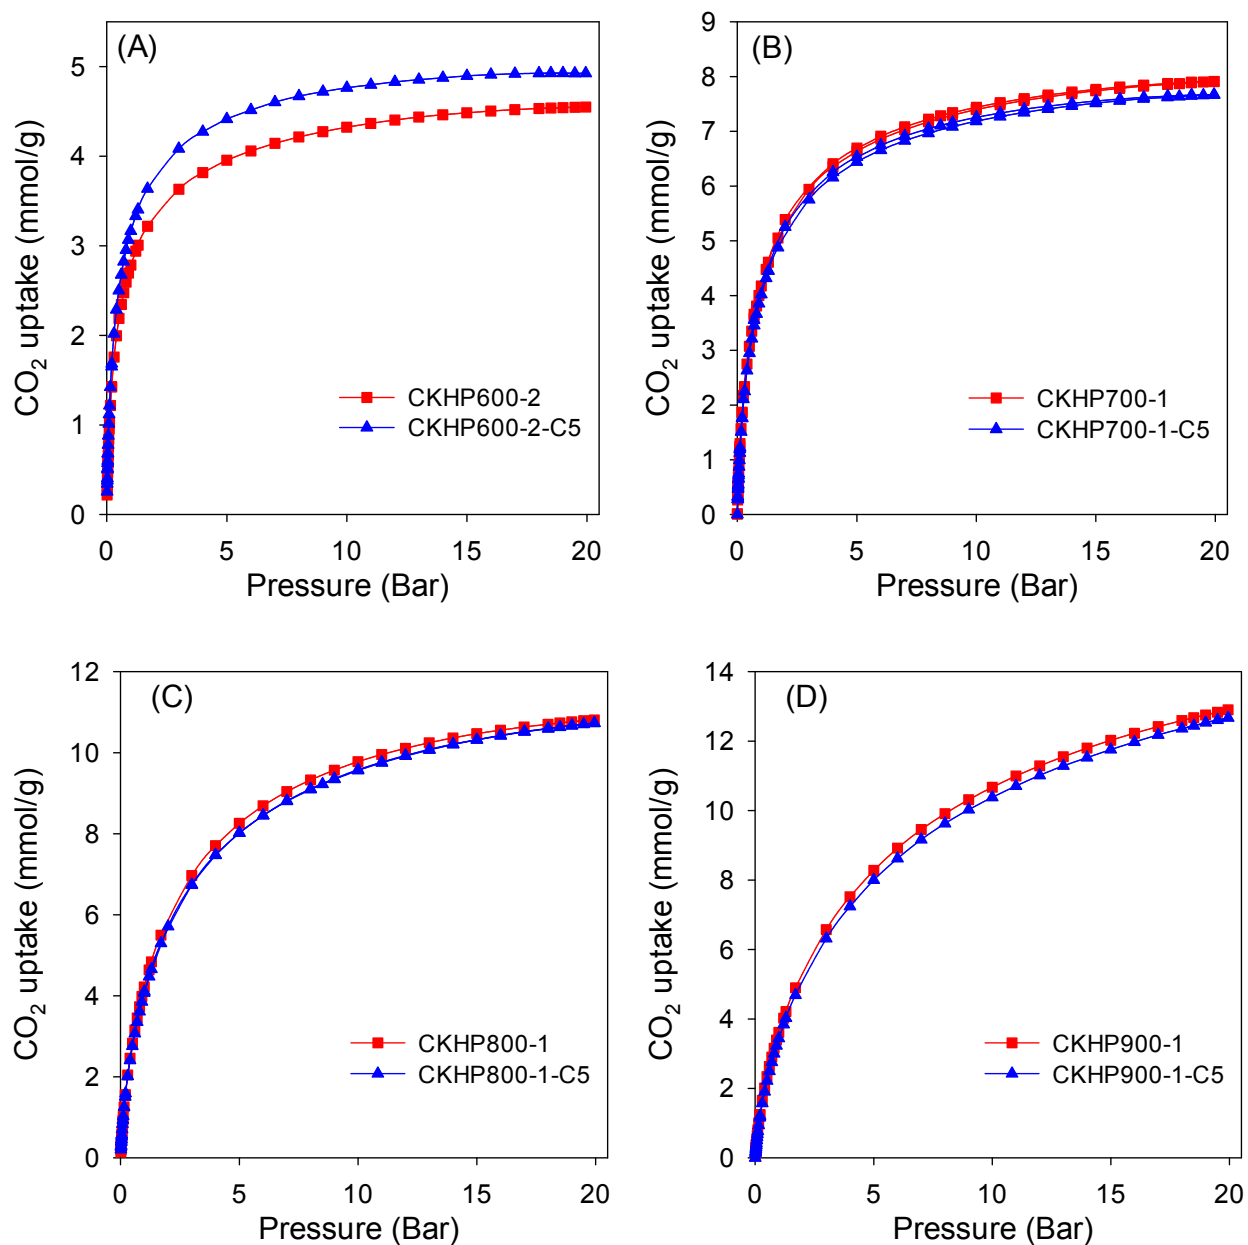

**Supporting Figure S34.** CO<sub>2</sub> uptake isotherms at 25 °C and 0 – 20 bar for various CKHP carbons (A) CKHP600-2, (B) CKHP700-1, (C) CKHP800-1 and (D) CKHP900-1, before and after compaction at a load of 5 tons (i.e. 370 MPa).

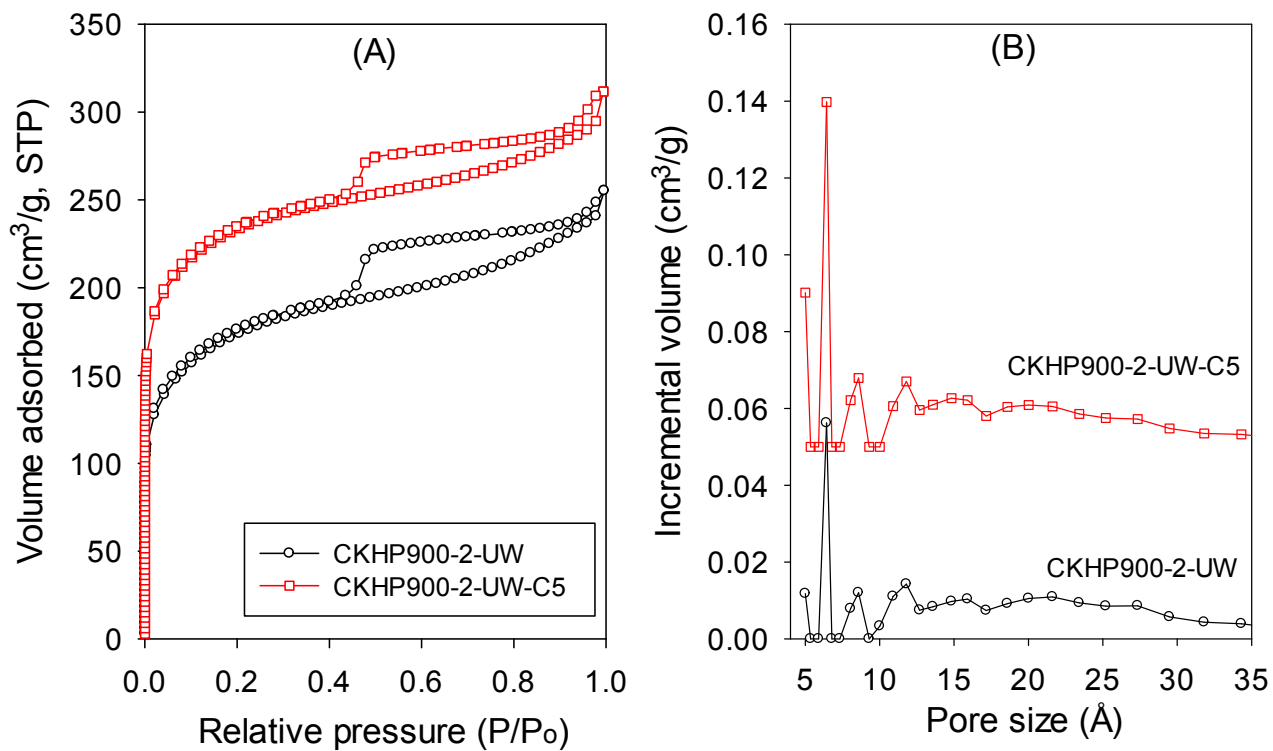

**Supporting Figure S35.** Nitrogen sorption isotherms (A) and pore size distribution curves (B) of unwashed CKHP carbon, before (CKHP900-2-UW) and after (CKHP900-2-UW-C5) compaction at a load of 5 tons (i.e. 370 MPa).

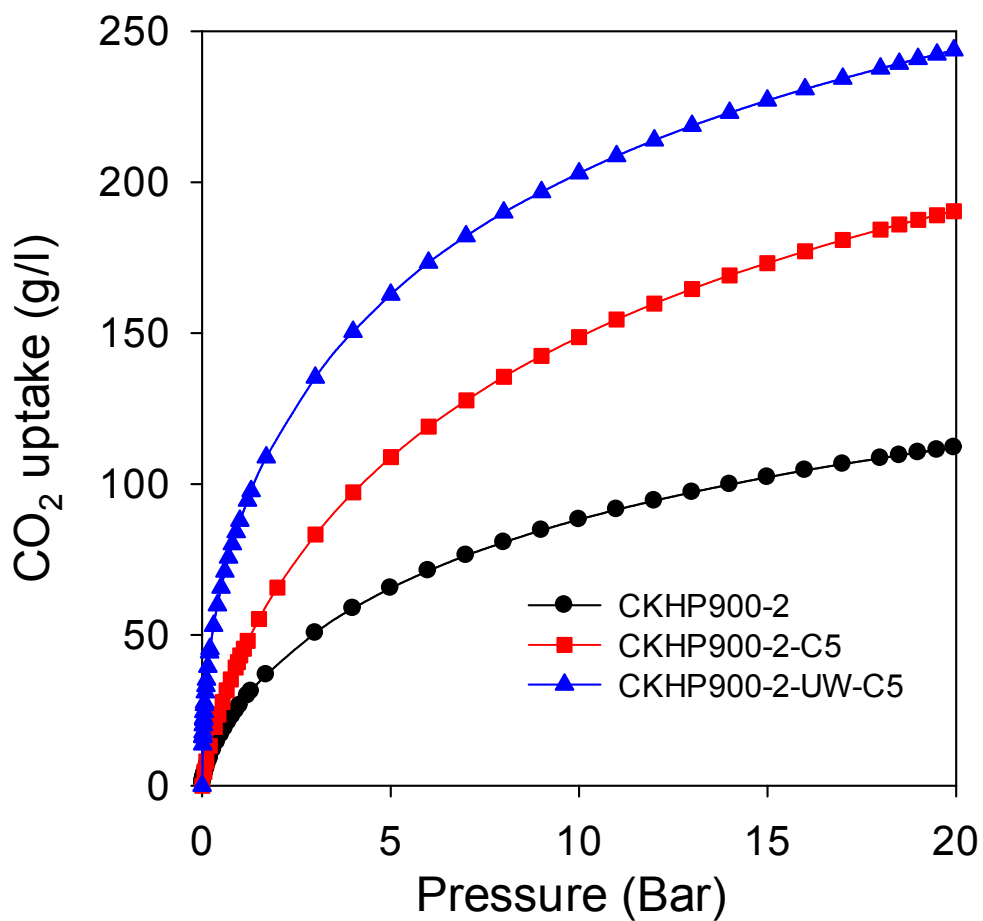

**Supporting Figure S36.** Volumetric CO<sub>2</sub> uptake of washed (CKHP900-2), unwashed (CKHP900-2-UW) and unwashed compacted (CKHP900-2-UW-C5) samples carbonised at 900 °C for 2 h.
